1

2

3

## Genomic architecture controls spatial structuring in Amazonian birds

4

5 Gregory Thom<sup>1\*</sup>, Lucas Rocha Moreira<sup>2,3</sup>, Romina Batista<sup>4,5</sup>, Marcelo Gehara<sup>6</sup>, Alexandre  
6 Aleixo<sup>7,8</sup>, Brian Tilston Smith<sup>1</sup>

7

8 <sup>1</sup>Department of Ornithology, American Museum of Natural History, New York, United States.

9 <sup>2</sup>Program in Bioinformatics and Integrative Biology, University of Massachusetts Chan Medical  
10 School, Worcester, MA, USA.

11 <sup>3</sup>Broad Institute of MIT and Harvard, Cambridge, MA, USA.

12 <sup>4</sup>Instituto Nacional de Pesquisas da Amazônia, Manaus, Brazil.

13 <sup>5</sup>Gothenburg Global Biodiversity Centre, Gothenburg, Sweden.

14 <sup>6</sup>Department of Earth and Environmental Sciences, Rutgers University, Newark, United States.

15 <sup>7</sup>Finnish Museum of Natural History, University of Helsinki, Helsinki, Finland.

16 <sup>8</sup>Instituto Tecnológico Vale, Belém, Brazil.

17 \*Corresponding author: [gthomesilva@amnh.org](mailto:gthomesilva@amnh.org)

18

### 19 **Abstract**

20 Large rivers are ubiquitously invoked to explain the distributional limits and speciation of the  
21 Amazon Basin's mega-diversity. However, inferences on the spatial and temporal origins of  
22 Amazonian species have narrowly focused on evolutionary neutral models, ignoring the potential  
23 role of natural selection and intrinsic genomic processes known to produce heterogeneity in

24 differentiation across the genome. To test how these factors may influence evolutionary  
25 inferences across multiple taxa, we sequenced whole genomes of populations for three bird  
26 species that co-occur in southeastern Amazonian and exhibit different life histories linked to  
27 their propensity to maintain gene flow across the landscape. We found that phylogenetic  
28 relationships within species and demographic parameters varied across the genome in predictable  
29 ways. Genetic diversity was positively associated with recombination rate and negatively  
30 associated with the species tree topology weight. Gene flow was less pervasive in regions of low  
31 recombination, making these windows more suitable for commonly used phylogenetic methods  
32 that assume a bifurcating-branching model. To corroborate that these associations were  
33 attributable to selection, we modeled the signature of adaptive alleles across the genome taking  
34 demographic history into account, and found that on average 31.6 % of the genome showed high  
35 probability for patterns consistent with selective sweeps and linked selection directly affecting  
36 the estimation of evolutionary parameters. By implementing a comparative genomic approach  
37 we were able to disentangle the effects of intrinsic genomic characteristics and selection from the  
38 neutral processes and show how speciation hypotheses are sensitive to genomic architecture.

39

## 40 **Introduction**

41       Across the Amazon Basin, large rivers delimit the distribution of hundreds of rainforest  
42 taxa (Cracraft 1985; Bates et al. 1998; da Silva et al. 2005). The spatial patterns that underlie  
43 these distributions have been central for understanding how diversity originates in the  
44 hyperdiverse Neotropics (Haffer 1969; Haffer 2008; Ribas et al. 2012; Smith et al. 2014; Silva et  
45 al. 2019). The species isolated by large rivers show complex and highly variable relationships  
46 that span millions of years, with limited congruence in spatial patterns of diversification and

47 historical demography (Smith et al. 2014; Silva et al. 2019). Reduced genomic approaches have  
48 revealed that factors such as gene flow may hinder inferences on the origins of species  
49 distributed across Amazonian rivers (Weir et al. 2015; Barrera-Guzmán et al. 2018; Ferreira et  
50 al. 2018; Berv et al. 2021; Del-Rio et al. 2021; Luna et al. 2021; Musher et al. 2021). In addition  
51 to gene flow, intrinsic (e.g., recombination rate) and extrinsic (e.g., selection) processes that  
52 influence the landscape of genomic diversity and differentiation may further obfuscate  
53 biogeographic inferences by affecting the estimation of phylogenetic and demographic  
54 parameters (Li et al. 2019; Martin et al. 2019; Johri 2021). Elucidating the relationships between  
55 the processes driving genomic evolution may yield more accurate inferences on the spatial and  
56 temporal history of species, providing a new perspective into the hotly debated origins of  
57 Amazonian biodiversity.

58         The genomic landscape of genetic diversity is ubiquitous across taxonomic groups  
59 indicating that evolutionary signal is dependent on which portions of the genome are examined  
60 (Delmore et al. 2018; Li et al. 2019; Martin et al. 2019; Manthey et al. 2021; Johri et al. 2021).  
61 Components of genomic architecture, such as chromosome inheritance, meiotic recombination,  
62 the density of targets of selection, biased gene conversion, and mutation rate operate  
63 simultaneously and heterogeneously across the genome, resulting in highly variable levels of  
64 genetic diversity and divergence at both intra- and interspecific scales (Meunier and Duret 2004;  
65 Garrigan et al. 2012; Cruickshank and Hahn 2014; Roux et al. 2014; Seehausen et al. 2014;  
66 Fontaine et al. 2015; Wolf and Ellegren 2017; Smith et al. 2018; Edelman et al. 2019; Martin et  
67 al. 2019; Johri et al.). For instance, recent evidence indicates that phylogenetic signal (e.g., the  
68 support for a particular topology) is associated with chromosome size and recombination rate,  
69 with larger chromosomes having slower rates that yield higher support for inferred species trees

70 (Martin et al. 2019). However, most methods used in phylogenomics do not account for the  
71 multiple processes that shape the genomic landscape, which may confound estimation of  
72 evolutionary histories (Ewing and Jensen 2016; Schrider et al. 2016; Li et al. 2019). This is  
73 critical given that modern biogeography relies heavily on phylogenetic and population genetic  
74 approaches to explore the spatial history and demography of populations (Knowles 2009;  
75 Edwards et al. 2021). Understanding how genomic architecture may affect inferences of spatial  
76 diversification histories will provide a clearer picture on the relative roles of intrinsic genomic  
77 characteristics, natural selection, and neutral processes on speciation (Pouyet et al. 2018; Johri et  
78 al. 2020).

79         Linked selection can have a large impact on genome-wide variation, but its effects on  
80 phylogenetic signal and demographic history of species are only starting to be explored (Li et al.  
81 2019; Martin et al. 2019). The indirect influence of positive and background selection on linked  
82 neutral sites can reduce genetic diversity around target regions, decreasing local effective  
83 population size ( $N_e$ ) and leading to faster fixation of alleles (Charlesworth 1998; Cruickshank  
84 and Hahn 2014; Burri et al. 2015). The intensity of linked selection on neutral sites is predicted  
85 by the interplay between the local density of targets under selection and the recombination rate,  
86 with more pronounced reductions in genetic diversity occurring in genomic regions with stronger  
87 selection and lower recombination (Smith and Haigh 1974; Charlesworth et al. 1993; Hudson  
88 and Kaplan 1995; Gillespie 2000; Zeng 2013). Areas of low recombination should also be more  
89 resistant to the confounding effects of gene flow and function as hotspots of phylogenetic signal  
90 (Martin et al. 2019; Chase et al. 2021). In these regions, linkage is maintained between  
91 introgressed variants and large genomic blocks may be removed from the population if  
92 deleterious alleles are present (Brandvain et al. 2014; Schumer et al. 2018; Mořkovský et al.

93 2018). The reduced impact of gene flow in regions of low recombination indicates that the  
94 phylogenetic signal is more likely to follow a bifurcating tree model, fitting the assumptions of  
95 most phylogenetic methods (Li et al. 2019; Martin et al. 2019). However, linked selection on low  
96 recombination areas violates neutral models of evolution and affects genome-wide estimations of  
97 demographic parameters (Schridder et al. 2016; Johri et al. 2020). A growing number of studies  
98 have reported associations between recombination, levels of genetic diversity, and phylogenetic  
99 relationships, both within and between chromosomes (Cutter and Payseur 2013; Burri et al.  
100 2015; Dutoit, Burri, et al. 2017; Tigano et al. 2021).

101         Although recent studies show that linked selection impacts a larger proportion of the  
102 genome than previously thought (Kern and Hahn 2018; Pouyet et al. 2018), the degree of this  
103 impact varies between species (Jensen et al. 2019; Tigano et al. 2021). For instance, the  
104 divergence between populations with high rates of gene flow might be restricted to small areas of  
105 the genome, maintained by strong divergent selection whereas the vast majority of the genome  
106 might show reduced differentiation due to widespread introgression (Ellegren et al. 2012). In  
107 contrast, genomic differentiation in allopatric populations, or under reduced levels of gene flow,  
108 tends to be more widespread, given the higher contribution of genetic drift sorting alleles in  
109 isolated populations. This latter scenario should produce a stronger association between genomic  
110 architecture and levels of genetic differentiation across the genome.

111         In this study, we model the impact of genomic architecture on patterns of genetic  
112 diversity and spatial differentiation of three bird species that co-occur in southeastern  
113 Amazonian. These taxa have different propensities to move across space that are linked to their  
114 life histories, resulting in landscapes of genomic differentiation impacted by distinct levels of  
115 gene flow. We hypothesize that if linked selection led to congruent patterns of genetic diversity

116 across the genome, then metrics associated with species differentiation and genetic diversity  
117 should be correlated with recombination rate, the density of targets under selection, and  
118 chromosome size. Alternatively, species could have idiosyncratic patterns of association with  
119 genomic architecture, driven by other factors such as historical demography and the level of  
120 differentiation across rivers. We demonstrate that the interplay between recombination, selection,  
121 and gene flow lead to a highly variable landscape of genetic diversity and differentiation within  
122 and between species, and impact biogeographic inference under different population histories.

123

## 124 **Results**

125 *Population genetics summary statistics and genomic features vary between species and across*  
126 *the genome*

127 We generated 95 whole-genome sequences for three species of birds, *Phlegopsis*  
128 *nigromaculata* (n=31), *Xiphorhynchus spixii* (n=31), and *Lipaugus vociferans* (n=26) that are co-  
129 distributed across three Amazonian areas of endemism, the Tapajos, Xingu, and Belem (Figure  
130 1; Table S1). We recovered a mean coverage of 10x across all species. On average, 88% of the  
131 pseudo-chromosome reference genomes were recovered with coverage above 5x per individual  
132 (Table S1). Benchmarking Universal Single-Copy Orthologs analyses performed in BUSCO  
133 v2.0.1 (Waterhouse et al. 2018) identified a high proportion of targeted genes on the references  
134 used for *P. nigromaculata* (89.3%), *X. spixii* (89.1%), and *L. vociferans* (93.4%; Table S2). The  
135 number of segregating sites were of a similar magnitude but varied: *P. nigromaculata* (n =  
136 20,838,931), *X. spixii* (n = 26,583,784), and *L. vociferans* (n = 21,769,167). The proportion of  
137 missing sites per individual was on average 18% (Table S1). Summary statistics estimated from  
138 100kb non-overlapping sliding windows and mean values per chromosome showed that levels of

139 genetic diversity varied substantially across species and within and between chromosomes  
140 (Figure 2). Populations from species with higher putative dispersal abilities (*L. vociferans* and *X.*  
141 *spixii*) had substantially more nucleotide diversity (Figure 3; Tables S3-S5). We observed higher  
142 nucleotide diversity on smaller chromosomes in *P. nigromaculata* (Pearson's correlation  $R = -$   
143  $0.6$ ;  $p$ -value =  $0.002$ ;  $n = 26$ ) and *X. spixii* (Pearson's correlation  $R = -0.36$ ;  $p$ -value  $0.047$ ;  $n =$   
144  $32$ ) but not in *L. vociferans* (Pearson's correlation  $R = -0.01$ ;  $p$ -value =  $0.94$ ;  $n = 32$ ; Figure S1-  
145 S6; Table S6-S11). We also found similar associations with *Dxy*, number of segregation sites,  
146 and Tajima's *D* (Figure S1-S6; Table S6-S11). These results support a highly heterogeneous  
147 landscape of genetic diversity across the genome of the three studied species.

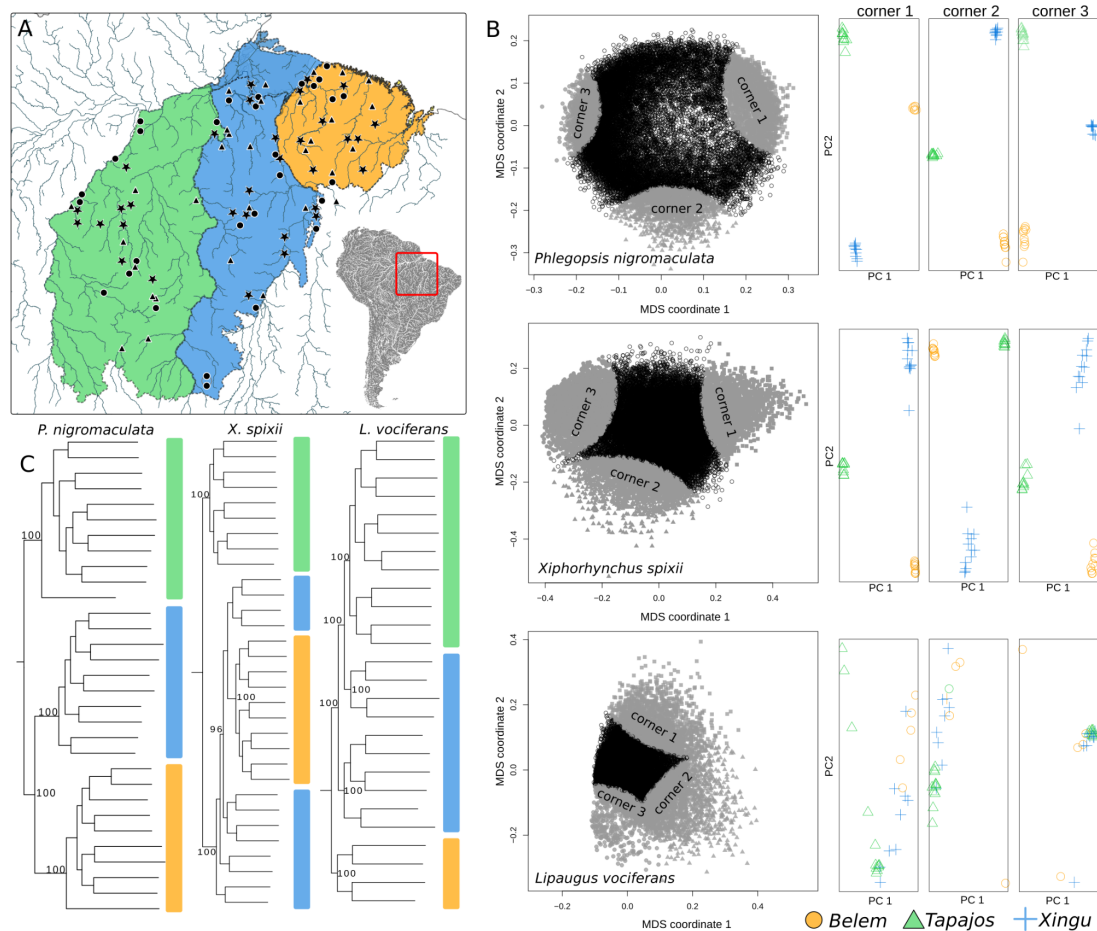

148

149

150 **Figure 1:** Contrasting patterns of genomic differentiation and spatial relationships between  
151 populations of three species of birds occurring in southeastern Amazonia. Geographic  
152 distribution of genomic samples for each species **(A)**. Triangles, stars, and circles are sampled  
153 localities for *Phlegopsis nigromaculata*, *Xiphorhynchus spixii*, and *Lipaugus vociferans*,  
154 respectively. Each colored polygon in the map represents a major Amazonian interfluvium (area of  
155 endemism): Tapajos (Green), Xingu (Blue), and Belem (Yellow). **(B)** Patterns of genetic  
156 structure across the genome were obtained with local PCAs based on 10kb windows. Left: plots  
157 for the first and second multidimensional coordinates, where each point represents a genomic  
158 window. Gray points represent corners clustering the 10% of the windows closer to the three  
159 further points in the graph. Right: PCA plots for the first and second principal components,  
160 combining the windows of each corner. **(C)** Supermatrix phylogenetic estimations based on  
161 concatenated SNPs. Numbers on the nodes represent bootstrap support for major nodes in the  
162 tree. Color bars next to terminals represent geographic location following the map (A).  
163

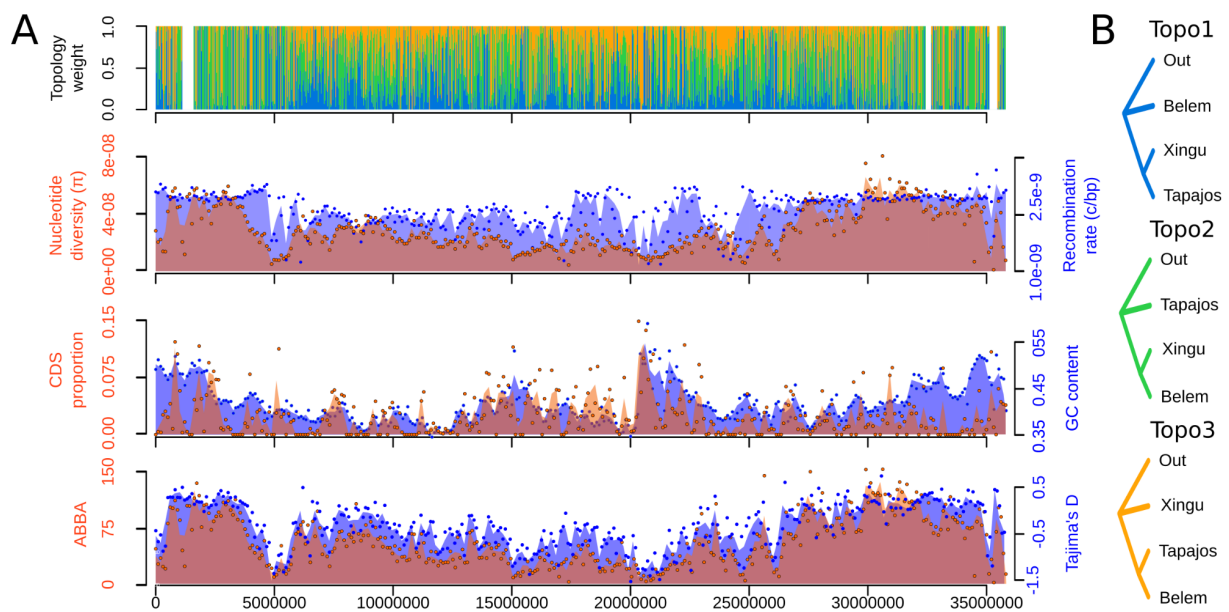

164

165 **Figure 2:** Phylogenetic signal for the species tree was higher on central portions of



166 chromosomes and was associated with genomic architecture. **(A)** Example of how phylogenetic  
167 signal and summary statistics are distributed across a chromosome. Shown are pseudo-  
168 chromosome 6 of *P. nigromaculata*. On the top graph, colored bars represent the weight for the  
169 three alternative topologies shown in **(B)** for the relationship between Tapajos, Belem, and  
170 Xingu areas of endemism. On the three bottom graphs, the magenta color represents the overlap  
171 between the orange (y-axis on the left) and blue (y-axis on the right) tones. Estimates of  
172 nucleotide diversity, recombination rate, and Tajima's D were based on the Tapajos population.  
173 ABBA represents the number of sites supporting Topology 2 assuming Topology 1 as the species  
174 tree.

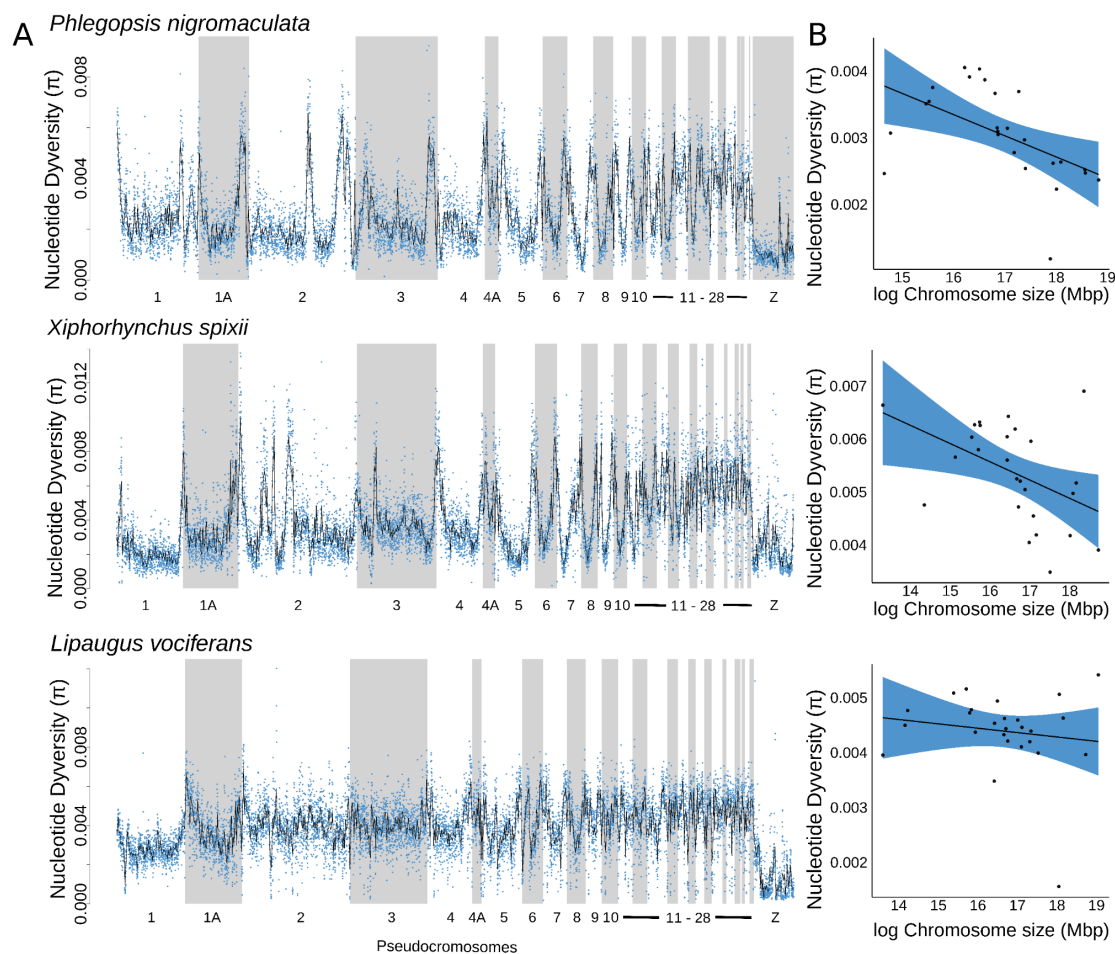

175

176 **Figure 3:** Nucleotide diversity varied within and between pseudo-chromosomes and across

177 species. **(A)** Distribution of nucleotide diversity ( $\pi$ ) across chromosomes for the three studied  
178 species. **(B)** Scatterplot and regression line with 95% confidence interval models with average  
179 nucleotide diversity as a function of chromosome size. *Phlegopsis nigromaculata* - Pearson's  
180 correlation  $R = -0.6$ ;  $p$ -value = 0.002;  $n = 26$ ; *Xiphorhynchus spixii* - Pearson's correlation  $R = -$   
181 0.36;  $p$ -value 0.047;  $n = 32$ ; *Lipaugus vociferans* - Pearson's correlation  $R = -0.01$ ;  $p$ -  
182 value=0.94 ;  $n = 32$ .

183 We found that genomic regions with a reduced meiotic recombination rate were less  
184 impacted by gene flow, and had stronger signatures of linked selection, with greater genetic  
185 differentiation. To test for associations between recombination rate and genetic metrics while  
186 accounting for historical demography, we estimated the per-base recombination rate ( $r$ ) with  
187 ReLERNN (Adrion et al. 2020). Recombination rate varied considerably across the genome of  
188 *P. nigromaculata* (mean  $r = 2.103e-9$ ; SD =  $4.413e-10$ ), *X. spixii* (mean  $r = 1.234e-9$ ; SD =  
189  $7.190e-10$ ), and *L. vociferans* (mean  $r = 1.776e-9$ ; SD =  $4.025e-10$ ; Figure S7) but in predictable  
190 ways. We found that regions with higher recombination rates were often in chromosome ends  
191 (Figure S7) and smaller chromosomes (Figure S4-S6), and were positively correlated with gene  
192 density and nucleotide diversity in all three species (Figure S8; Table S12). Loess models with  
193 recombination rate and gene density as covariate predictors explained a large proportion of the  
194 variation in genetic diversity in *P. nigromaculata* ( $R^2 = 0.33$ ), *X. spixii* ( $R^2 = 0.65$ ), and *L.*  
195 *vociferans* ( $R^2 = 0.41$ ; Figure S8, S9). These results suggest a significant effect of linked  
196 selection driving genomic patterns of diversity.

197 Genome-wide levels of differentiation between species match the evolutionary  
198 expectations associated with their life history. The least dispersive species that inhabit the  
199 understory, *P. nigromaculata*, had the most pronounced levels of genetic structure across rivers,

200 followed by *X. spixii* which occupies the midstory, and the most dispersive, canopy species, *L.*  
201 *vociferans*, had the shallowest structure. To visualize patterns of genetic structure based on  
202 independently evolving sets of SNPs (linkage disequilibrium  $R^2 < 0.2$ ), we used Principal  
203 Component Analysis (PCA). In *P. nigromaculata*, three isolated clusters of individuals supported  
204 strong geographic structure, consistent with previous studies based on mtDNA, spatially  
205 matching areas of endemism (Aleixo et al. 2009; Silva et al. 2019; Figure 1, S10). In *X. spixii*,  
206 the PCA supported strong differentiation between the Tapajos from Belem and Xingu  
207 populations, which had a substantial overlap in PC2 (5.0% of the explained variance; Figure  
208 S10). For *L. vociferans*, all samples clustered together, indicating a lack of spatial structure in the  
209 genetic variation (Figure S10). In agreement with these results, average *Fst* between populations  
210 was considerably higher in *P. nigromaculata* (mean *Fst* = 0.1262; SD = 0.09) than in *X. spixii*  
211 (mean *Fst* = 0.059; SD = 0.046, and *L. vociferans* (mean *Fst* = 0.008; SD = 0.019). Pairwise *Fst*  
212 between populations was, in general, negatively correlated with genetic diversity metrics in all  
213 three species, and it was negatively correlated with recombination rate in *P. nigromaculata* and  
214 *X. spixii* (Figure S1-S6; Table S6-S11).

215       Levels of genetic structure varied substantially across the genome, indicating that the  
216 support for alternative spatial patterns of differentiation was directly associated with intrinsic  
217 genomic processes. To explore the genome-wide variation in genetic structure, we used local  
218 PCAs across sliding windows using lostruct v0.0.0.9 (Li and Ralph 2019). Local PCAs showed  
219 that distinct parts of the genome support different clustering patterns in *P. nigromaculata* and *X.*  
220 *spixii*, likely reflecting distinct evolutionary relationships between populations (Figure 1). In *L.*  
221 *vociferans*, we observed a gradient between Tapajos, Xingu, and Belem individuals, without  
222 clear structuring, consistent with the low *Fst* estimates reported for this species (Figure 1).

223 Genetic structure, as described by the first two MDS axes obtained with lostruct, was associated  
224 with recombination in *P. nigromaculata* (MDS1:  $R^2 = -0.04$ , p-value < 0.0001, n = 20,143  
225 windows) and *X spixii* (MDS1:  $R^2 = 0.017$ , p-value < 0.0001, n = 28,803 windows; MDS2:  $R^2 =$   
226  $-0.15$ , p-value < 0.0001, n = 28,803 windows) but not in *L. vociferans* ( $R^2 < 0.001$  for all MDSs,  
227 n = 25,007 windows), indicating that for the species with marked genetic structure across rivers,  
228 recombination was a key predictor of spatial differentiation. These results highlight the high  
229 variation in patterns of genetic structure across the genome as well as the contrast between  
230 patterns of diversification of sympatric species distributed across Amazonian rivers.

231         Although the association between recombination rate and genetic diversity supports the  
232 effect of linked selection, it does not indicate which portions of the genome are directly impacted  
233 by this process. To further explore the extent of linked selection across the genome, we used a  
234 machine learning approach implemented on diploS/HIC (Kern and Schrider 2018) to predict  
235 which 20kb genomic windows were evolving under neutrality or had signatures of selective  
236 sweeps and linked selection (i.e., background selection; Charlesworth et al. 1993). We initially  
237 simulated genomic windows under distinct selective regimes accounting for historical  
238 oscillations in effective population size and uncertainty in demographic parameters using discoal  
239 (Kern and Schrider 2016). To account for the historical demography of the analyzed populations  
240 we estimated population size changes occurring in the last 300,000 years with SMC++ (Terhorst  
241 et al. 2017) and included these estimates in the discoal simulations (Figure S11). The  
242 convolutional neural network used in this approach produced an average accuracy for model  
243 classification of 0.69 and a false positive rate of 0.27 among species (Table S13). In all three  
244 species, a significant proportion of the genome was estimated to have signatures of selective  
245 sweeps or linked selection (mean = 43.3%). In *P. nigromaculata*, 30.29% of tested windows had

246 a high probability ( $>0.70$ ) for models including the direct or indirect effect of selection (Figure  
247 4). For *X. spixii* (44.83%) and *L. vociferans* (54.77%), we obtained even higher proportions  
248 (Figure 4). By accounting for the estimated false positive rate on average 31.6% of the genomes  
249 we analyzed had signatures of selective sweeps or linked selection.

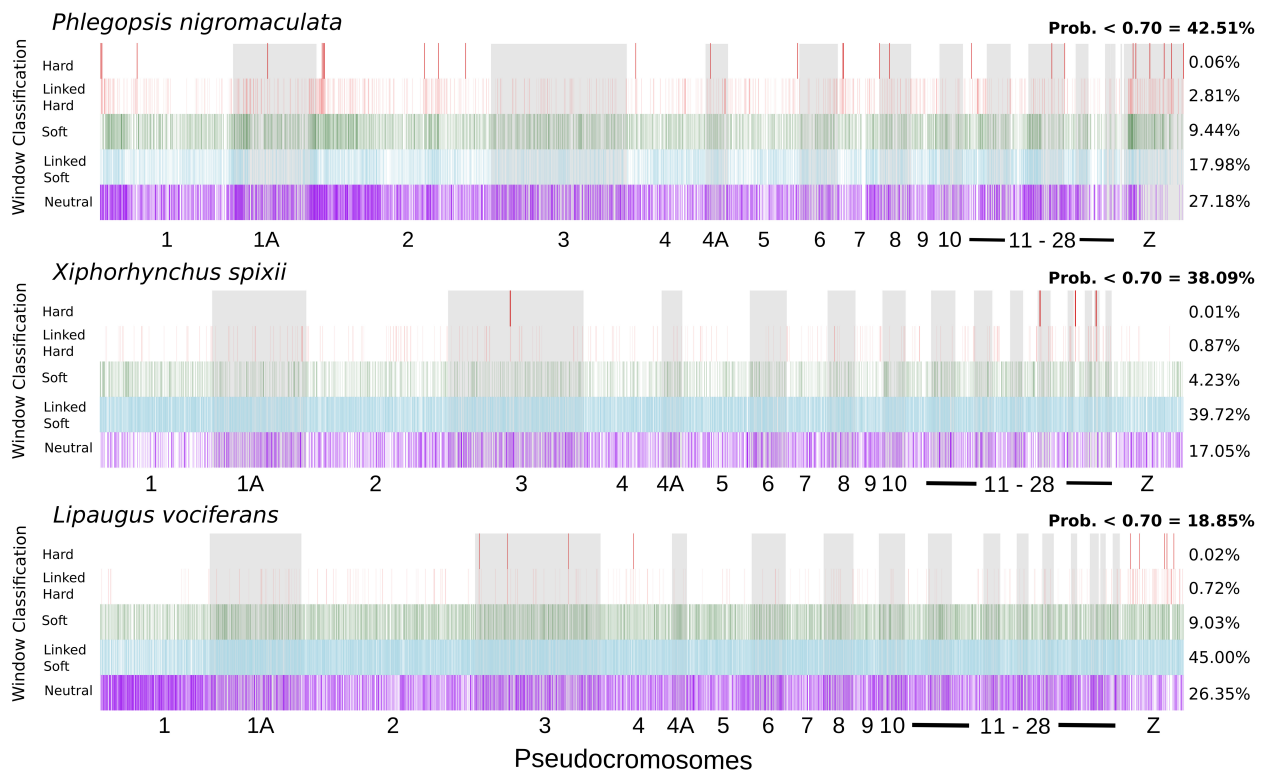

250

251 **Figure 4:** Signature of selection across the genomes of the studied species. Vertical bars  
252 represent the model with the highest probability for 20 kb genomic windows. On the right is the  
253 percentage of windows assigned to each of the five models with high probability ( $>0.70$ ): hard  
254 sweep, linked to hard sweep, soft sweep, linked to soft sweep, and neutral. In Bold is the  
255 proportion of windows with low probability for model classification.

256

257 *Phylogenetic signal was associated with genomic architecture.*

258 We explored how evolutionary relationships were distributed across the genome of the

259 co-occurring species to test which aspects of the genomic architecture best predicted  
260 phylogenetic signal. First, we estimated topologies for each species in IQTREE-2 v2.1.5  
261 (Nguyen et al. 2015) by concatenating SNPs and controlling for ascertainment bias (Figure 1).  
262 We found substantial variation in topology between species, with clades matching the three areas  
263 of endemism only in *P. nigromaculata*. In *X. spixii*, Belem individuals were nested within Xingu  
264 despite forming a monophyletic group. In *L. vociferans*, the clustering of individuals matched  
265 their spatial distribution.

266         The support for alternative species tree topologies varied with recombination rate and  
267 genetic diversity (Figure 5). To explore how phylogenetic relationships varied with genomic  
268 characteristics and population genetics summary statistics, we estimated gene trees for non-  
269 overlapping genomic windows and calculated species trees for subsets of the genome. For *P.*  
270 *nigromaculata* we did not obtain high support for any topology when estimating the species tree  
271 from genome-wide loci, but the topology with the highest probability (posterior probability =  
272 0.81) matched the concatenated SNP tree (Figure 5). The topology estimated from genomic  
273 regions with high recombination matched the concatenated tree, but regions of low  
274 recombination placed Tapajos and Xingu as sisters (Figure 5). A similar pattern was observed  
275 when filtering gene trees based on  $\pi$  and  $D_{xy}$ . The phylogenetic signal in *X. spixii* and *L.*  
276 *vociferans* were more stable, with widespread support for the same topology across the genome  
277 but with substantially higher weight for that topology in areas with lower recombination and  
278 lower genetic diversity. Phylogenetic signal also co-varied with chromosome size in *P.*  
279 *nigromaculata* but not in *X. spixii* and *L. vociferans*. In *P. nigromaculata*, macro chromosomes  
280 supported the topology found in low recombination areas (Topology 1), while  
281 microchromosomes (<50MB) supported the concatenated tree (Topology 2; S12-S14). Our

282 results suggest that support for the species tree was higher in regions with reduced diversity and  
 283 recombination rates.

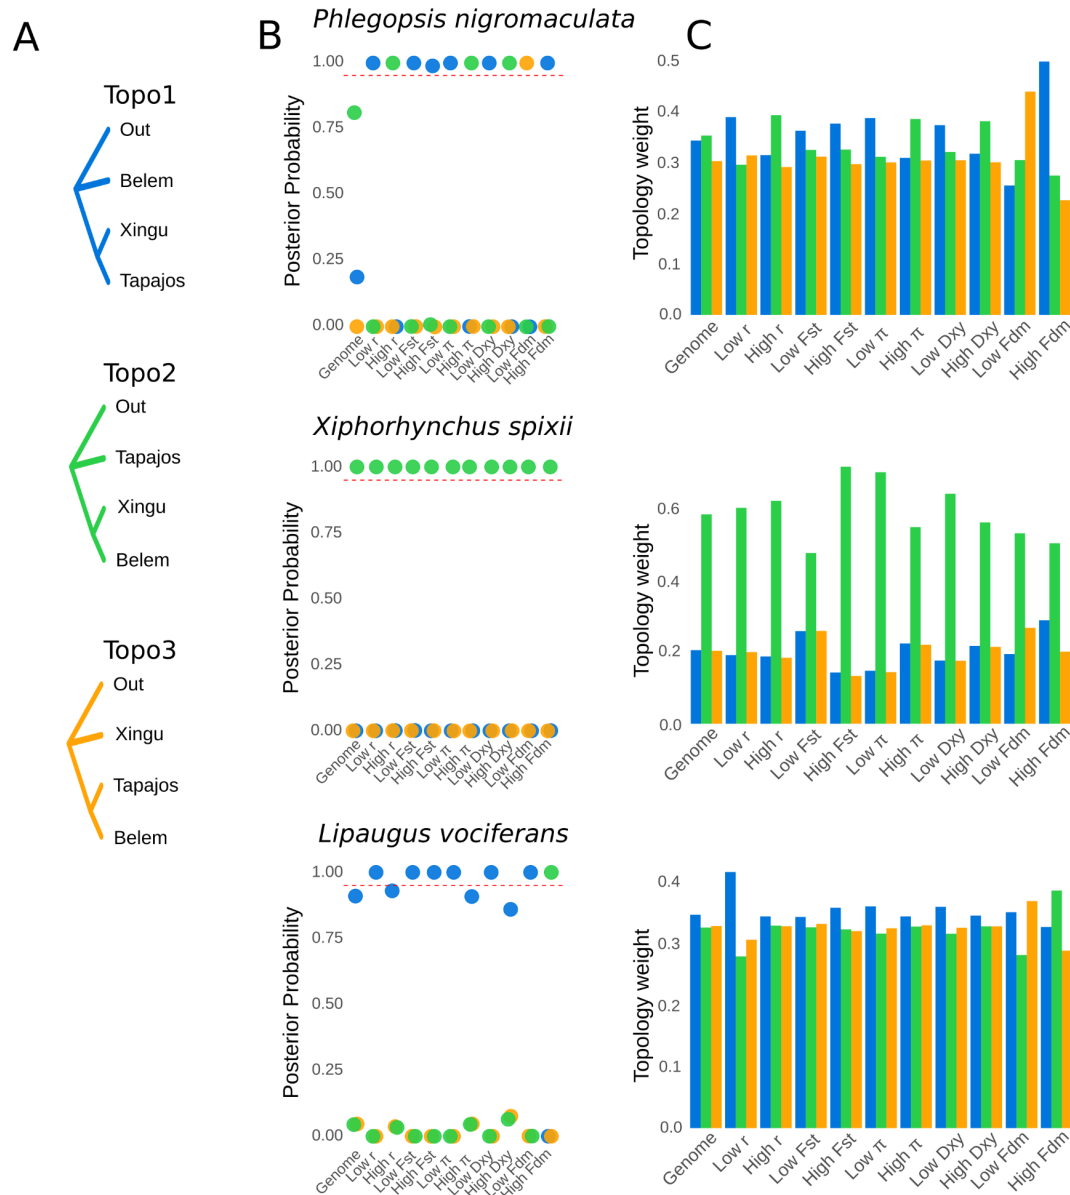

284

285 **Figure 5:** Species tree and topology weights vary accordingly to recombination rate and genetic  
 286 diversity. **(A)** Alternative topologies for the relationship between the three areas of endemism  
 287 and the outgroup; **(B)** posterior probabilities for the three topologies for windows across the  
 288 whole-genome and for distinct subsets of genomic windows that were selected based on upper

289 and lower thresholds for summary statistics; and **(C)** weights for three topologies for windows  
290 across the whole-genome and for distinct subsets of genomic windows that were selected based  
291 on upper and lower thresholds for summary statistics.  $r$  - Recombination rate;  $F_{st}$  - Fixation  
292 index;  $\pi$  - Nucleotide diversity;  $D_{xy}$  - Genetic distance;  $F_{dm}$  - Introgression proportion.

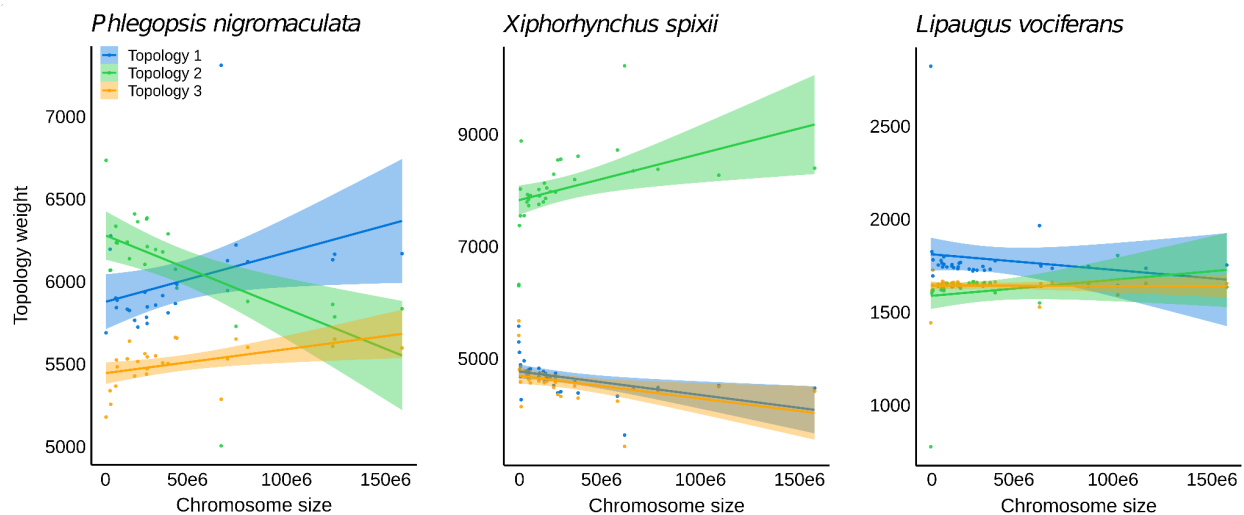

293  
294 **Figure 6:** Chromosome size was associated with topology weight across the genome of  
295 *Phlegopsis nigromaculata* (Topology 2 -  $R^2 = 0.31$ , p-value = 0.003; Topologies 1 and 2 p-value  
296  $> 0.05$ ,  $n = 26$ ) but not in *Xiphorhynchus spixii* (p-value  $> 0.05$  for all three topologies,  $n = 32$ ),  
297 and *L. vociferans* (p-value  $> 0.05$  for all three topologies,  $n = 32$ ). Scatterplot and regression line  
298 with 95% confidence interval showing the relationship between topology weights and  
299 chromosome size. We tested three alternative unrooted topologies for the relationship between  
300 the three areas of endemism (Tapajos, Xingu, and Belem): Topology 1 (outgroup, Belem (Xingu,  
301 Tapajos)), Topology 2 (outgroup, Tapajos (Xingu, Belem)), and Topology 3 (outgroup, Xingu  
302 (Belem, Tapajos)).

303

304 The weight for alternative topologies varied considerably across windows and was  
305 associated with genomic architecture. To test how the probability of alternative topologies varied



306 across the genome, we calculated topology weights using Twisst (Martin and Van Belleghem  
307 2017) independently for each species. This analysis was performed on genomic windows with  
308 100 SNPs and assumed the three possible unrooted trees representing the relationship between  
309 the three areas of endemism plus an outgroup. From hereafter we refer to these three unrooted  
310 topologies as Topology 1 (outgroup, Belem (Xingu, Tapajos)), Topology 2 (outgroup, Tapajos  
311 (Xingu, Belem)), and Topology 3 (outgroup, Xingu (Belem, Tapajos)). When averaging weights  
312 for genome-wide windows of *P. nigromaculata* we observed a higher weight for Topology 2,  
313 followed closely by Topology 1. When considering distinct subsets of genomic windows based  
314 on upper and lower thresholds for summary statistics, for *P. nigromaculata*, there was substantial  
315 variation in which topology had the highest average weight, consistent with our species tree  
316 approach (Figure 5). For the other two species, we found less variation along the genome for the  
317 topology with the highest average weight. The topology with the highest weight also varied  
318 across chromosomes of different sizes. In *P. nigromaculata*, smaller chromosomes had a higher  
319 weight for Topology 2, putatively derived from gene flow (Figure 6). In *X. spixii* we observed a  
320 progressive increase in the weight for the species tree (Topology 2) in larger chromosomes,  
321 despite a non-significant correlation. In *L. vociferans* all three topologies had a similar weight  
322 across chromosomes. In summary, these results reinforced the view that intrinsic genomic  
323 features directly shape the distribution of the phylogenetic signal.

324         The conflicting phylogenetic pattern observed for *P. nigromaculata* could be driven by  
325 gene flow increasing the signal for the topology where introgressing populations are sisters. To  
326 explore how topology weight varied according to gene flow and intralocus recombination, we  
327 performed coalescent simulations with demographic parameters similar to those estimated for *P.*  
328 *nigromaculata*, and we calculated topology weights using the approach mentioned above. Our

329 simulations suggested that in the absence of gene flow, the frequency of alternative topologies  
330 was similar (Figure S15). The presence of gene flow between non-sister species produces a  
331 deviation from this pattern, increasing the average weight for the topology with introgressing  
332 populations as sisters. This relationship was further intensified by intralocus recombination  
333 (Figure S15). Although our simulations corroborate that recombination rate by itself does not  
334 affect levels of genetic diversity (Hudson 1983), it does affect levels of ILS between populations,  
335 particularly when gene flow was present by increasing the variance of topology weights across  
336 the genome (Figure S15). When comparing the results obtained with this simulation approach  
337 with the genome-wide topology weights obtained for *P. nigromaculata*, our results suggest that  
338 gene flow between non-sister taxa was likely increasing the weights for one of the two best  
339 topologies.

340

#### 341 *Gene flow affected phylogenetic inference*

342 When modeling gene flow, our results indicated that the topology recovered for low  
343 recombination areas was the best genome-wide tree. To estimate the probability for alternative  
344 topologies and demographic parameters for the entire genome explicitly accounting for gene  
345 flow we used a multiclass neural network approach with Keras v2.3  
346 (<https://github.com/rstudio/keras>) in R. We simulated genetic data under the three possible  
347 unrooted topologies for the relationship between areas of endemism using uniform priors for  $N_e$ ,  
348 gene flow between geographically adjacent populations, and divergence times. We selected one  
349 10kb window every 100kb to reduce the effect of linkage between windows, excluding windows  
350 with missing data. This procedure yielded a total of 7,213, 9,140, and 9,693 windows for *P.*  
351 *nigromaculata*, *X. spixii*, and *L. vociferans*, respectively. Finally, we randomly selected 5,000

352 windows per species. Genomic windows were converted into feature vectors representing the  
353 mean and variance of commonly used population genetics summary statistics. On average, this  
354 approach produced highly accurate model classification probabilities (neural network accuracy =  
355 0.93; categorical cross-entropy = 0.17) and a high correlation between observed and estimated  
356 parameters for testing data sets with low mean absolute errors (Table S14-S16). PCAs and  
357 goodness-of-fit analyses showed that simulated models matched observed values of summary  
358 statistics. In *P. nigromaculata*, we obtained a high probability for Topology 1 (probability =  
359 0.86), conflicting with the concatenated and species tree topology (Topology 2; probability =  
360 0.12) but agreeing with the topology of low recombination areas (Table S17). Divergence times  
361 were highly variable between species. In *P. nigromaculata* the initial divergence between Belem  
362 and the ancestor of the Tapajos and Xingu lineages, diverged at 149,836ya (SD = 15,272; MAE  
363 = 36,576; Table S14), followed by the divergence between the later populations at 77,866ya (SD  
364 = 17,849; MAE = 37,810). In *X. spixii* (Topology 2; probability = 0.99), the first divergence  
365 event was estimated at 218,858ya (SD = 12,095; MAE = 30,668), followed by a more recent  
366 divergence event at 40,303ya (SD = 16,236; MAE = 32,798; Table S15). For *L. vociferans*  
367 (Topology 1; probability = 0.54) divergence times were the most recent, occurring within the last  
368 40,000 years, reflecting the lack of population structure in this species (Table S16). Our data  
369 indicated that gene flow among *P. nigromaculata* populations ( $2Nm$ ) was negligible between  
370 Tapajos and Xingu (migration between Tapajos and Xingu = 0.002; SD = 0.005; MAE = 0.161)  
371 and low between the non-sisters in Xingu and Belem (migration between Xingu and Belem =  
372 0.484; SD = 0.486; MAE = 0.138; Table S14). In *X. spixii*, we inferred moderate rates of gene  
373 flow between populations, which was highest between the recently diverged Xingu and Belem  
374 populations (migration between Xingu and Belem = 2.075; SD = 0.144; MAE = 0.139; Table

375 S15). In *L. vociferans* we also estimated moderate to high gene flow among populations  
376 (migration between Tapajos and Xingu = 2.347; MAE = 0.175; migration between Xingu and  
377 Belem = 1.827; MAE = 0.205; Table S16). Although the phylogenetic conflict found in *P.*  
378 *nigromaculata* was attributed to introgression, we found relatively reduced levels of gene flow  
379 between populations, indicating that ancestral gene flow might be the source of the conflict.

380

### 381 *Selection biases estimates of demographic parameters*

382         Given the considerable proportion of the genome with signatures of selective sweeps and  
383 background selection in all three species, we explored how selection might impact estimates of  
384 demographic parameters. We estimated parameters from subsets of genomic windows classified  
385 under distinct selection regimes with diploS/HIC using our machine learning approach. We  
386 selected up to 1,000 windows assigned to each of the five models tested in diploS/HIC with a  
387 probability > 0.70, and estimated demographic parameters based on the topology with the  
388 highest probability considering all genomic windows (Topology 1 for *P. nigromaculata* and *L.*  
389 *vociferans*, and Topology 2 for *X. spixii*). We found that genome-wide windows yielded more  
390 similar estimates for *Ne* and gene flow from regions inferred to be subject to selection than  
391 neutral regions (Figure 7). Our approach supported higher *Ne* and gene flow in neutral areas of  
392 the genome than areas under selection with little to no overlap of standard error distributions  
393 (Figure 7).

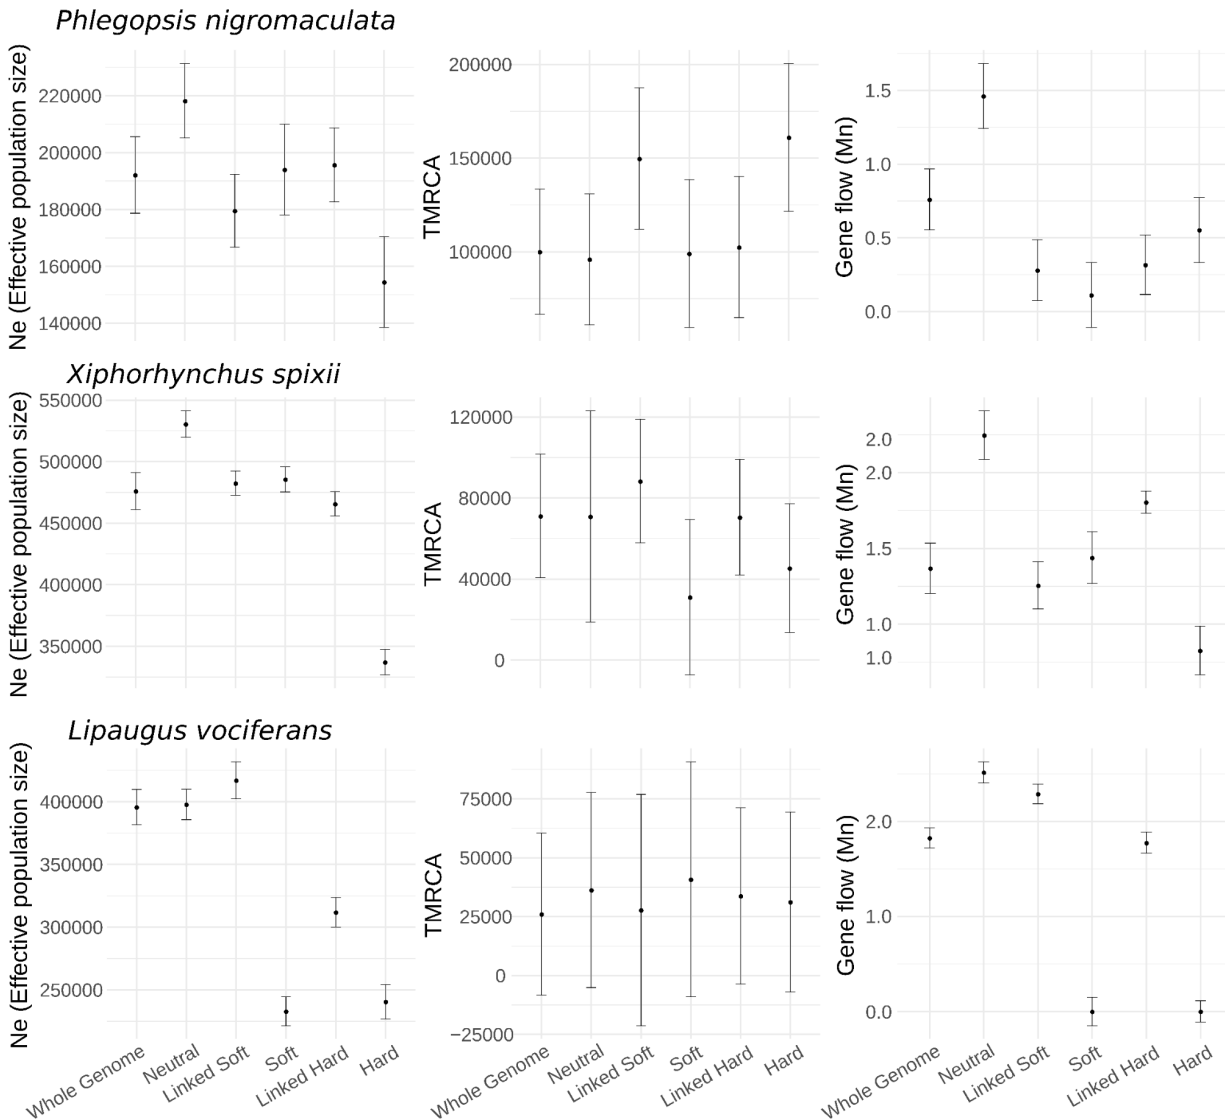

394

395 **Figure 7:** Genomic regions inferred to be evolving neutrally had larger effective population sizes

396 and higher gene flow than areas with signatures of selection. Demographic parameter estimation

397 for the three studied species of Amazonian Birds.  $N_e$  - Effective population size of the Tapajos

398 population. TMRCA - Time to the most recent common ancestor of the most recent divergence

399 event; Gene flow - Gene flow rate between Tapajos and Xingu populations. Classes on the x-axis

400 represent genome-wide windows ( Whole Genome), and subsets of genomic windows assigned

401 with high probability to distinct models tested with diploS/HIC. Neutral - neutrally evolving

402 windows; Linked Soft - windows linked to a soft sweep; Soft - windows assigned to a soft

403 sweep; Linked Hard - windows linked to a hard sweep; Hard - windows assigned to a hard  
404 sweep.

405

406 Demographic parameters varied considerably across the genome and were strongly  
407 associated with the recombination rate (Figure S16; Table S18). To explore the associations  
408 between demographic parameter estimation and genomic architecture, we calculated the  
409 probability of alternative topologies and estimated demographic parameters for 100kb genomic  
410 windows, taking into account intralocus recombination. To increase model classification  
411 accuracy, we only tested the two most likely topologies based on the spatial distribution of the  
412 populations. This approach yielded a high accuracy in model classification (accuracy = 0.9314;  
413 categorical cross-entropy = 0.18). We also recovered high correlations between simulated and  
414 pseudo observed data indicating good accuracy in parameter estimation for  $N_e$  (average  $R^2 =$   
415 0.94; average MAE = 73,099 individuals) and divergence times (average  $R^2 = 0.87$ ; average  
416 MAE = 39,172ya) but not for gene flow (average  $R^2 = 0.54$ ; average MAE = 0.19 migrants per  
417 generation). Effective population sizes and divergence times varied over one order of magnitude,  
418 and gene flow over two orders of magnitude across the genome. The substantial variation in  $N_e$   
419 and gene flow across the genome was associated with recombination rate in all three species,  
420 except gene flow in *L. vociferans* (Figure S16; Table S18). Variation in divergence time was not  
421 associated with recombination rate in any of the species (Table S18).

422 To further explore the signal for gene flow across the genome, we estimated  $D$  and  $fdm$   
423 statistics using window-based ABBA-BABA tests in 100kb non-overlapping sliding windows.  
424 We found little evidence for gene flow between populations of all three species, except between  
425 Belem and Xingu populations of *P. nigromaculata*. The gene flow inferred between these two  
426 populations of *P. nigromaculata* was associated with recombination rate (Figure 2, S1, S4). For

427 *L. vociferans* despite the lack of genetic structure, the D statistics failed to find any significant  
428 levels of introgression, likely due to the high levels of gene flow among all three populations,  
429 violating the ABBA-BABA model.

430

## 431 **Discussion**

432 Biogeographic patterns of Amazonian taxa exhibit a wide array of temporal and spatial  
433 divergences in a dynamic landscape (Smith et al. 2014; Lynch Alfaro et al. 2015; Penz et al.  
434 2015; de Oliveira et al. 2016; Byrne et al. 2018; Dagosta and De Pinna 2019; Silva et al. 2019).  
435 We found that genomic architecture adds an underappreciated layer of complexity that can  
436 obscure inferring the origins of the extraordinary Amazonian diversity by directly impacting the  
437 estimation of patterns of differentiation. Our study indicates that the interplay of selection, gene  
438 flow, and recombination shaped the genomic landscape of genetic diversity and in turn produced  
439 varying levels of phylogenetic signals across the genome. By exploring the effects of genomic  
440 architecture on phylogenetic and demographic parameter estimation across species with differing  
441 degrees of gene flow, we showed that accounting for the processes that produce an  
442 heterogeneous genomic landscape helps clarify interpretations on the geographic differentiation  
443 of Amazonian taxa.

444

### 445 *Applying genomic-architecture aware approaches to Amazonian biogeography*

446 We found that introgression, even if ancestral, can produce a highly heterogeneous  
447 landscape of phylogenetic conflict compromising biogeographic inference across Amazonia. For  
448 example, in *P. nigromaculata*, gene flow between non-sister taxa, as estimated with our model-  
449 based approach, was positively associated with support for an alternative topology (topology 2)

450 and recombination rate. This pattern likely affected genome-wide species tree and topology  
451 weight analyses. In contrast, the topology reflecting the most probable species tree (topology 1)  
452 was considerably more frequent in windows with low recombination rates. The phylogenetic  
453 conflict between alternative topologies has practical biogeographical implications. Support for  
454 topology 2 for *P. nigromaculata* would indicate the taxa diverged via a stepping-stone process  
455 from the west through the Tapajos, Xingu, and Belem regions, consistent with the Moisture  
456 Gradient Hypothesis (Silva et al. 2019). In contrast, if topology 1 reflects the population history  
457 of *P. nigromaculata*, it would indicate an opposite scenario, with an ancestral population in  
458 southeastern Amazonia, which could be linked to physiographic changes in the landscape (Albert  
459 et al. 2018; Musher et al. 2021). The results we obtained here are in agreement with simulations  
460 and empirical studies suggesting that in the presence of gene flow, low recombination areas are  
461 more prone to maintain the ancient branching signal (Li et al. 2019; Tigano et al. 2021). The  
462 strong linkage in low recombination regions should lead to the more effective removal of alleles  
463 introduced by hybridization that are more likely to be deleterious (Nachman and Payseur 2012;  
464 Schumer et al. 2018). Although the phylogenetic signal were more stable across the genomes of  
465 *X. spixii* and *L. vociferans*, it was also predicted by recombination rate and gene flow.  
466 Interestingly, in *L. vociferans*, we found substantially higher weights for the putative species-tree  
467 topology in regions of low recombination despite the lack of genetic structure across rivers  
468 (Figure 5), suggesting that spatial diffusion of alleles in a continuous population was also driven  
469 by genomic architecture. Collectively, these results indicate that genome-wide estimates of  
470 biogeographically relevant parameters might not recapitulate the effects of historical landscape  
471 changes on the genome.

472 We did not find any association between divergence time and recombination rate in our



473 model-based approach. This finding suggests that, by modeling gene flow and intra-locus  
474 recombination, we were able to obtain relatively stable estimates for divergence time across the  
475 genome. Simulation studies have reported that clades with a history of introgression will show  
476 extensive branch length distortion in bifurcating phylogenetic methods, depending on the age,  
477 direction, and intensity of gene flow (Leaché et al. 2014). We found that not accounting for gene  
478 flow and genomic architecture will likely impact divergence times estimates in phylogenetic  
479 approaches. Gene flow was considerably skewed towards lower values by selection and varied  
480 accordingly with the recombination rate. In this sense, even methods designed to incorporate  
481 gene flow into phylogenetic estimations such as phylogenetic network approaches (Solís-Lemus  
482 and Ané 2016; Wen et al. 2018), might lead to misleading results when considering genome-  
483 wide markers. Although phylogenetic networks are an ideal way to track the presence of gene  
484 flow, it might be difficult to disentangle the processes driving phylogenetic conflict, given that  
485 estimated introgression proportions might be biased by the genomic landscape. The pattern  
486 reported here might be common across the thousands of lineages isolated by Amazonian  
487 tributaries, given that multiple recent studies have been suggesting extensive introgression across  
488 rivers (Weir et al. 2015; Barrera-Guzmán et al. 2018; Ferreira et al. 2018; Berv et al. 2021; Del-  
489 Rio et al. 2021; Musher et al. 2021). By exploring the landscape of genomic differentiation in a  
490 comparative framework, we were able to directly elucidate the impact of varying gene flow  
491 regimes on inferring evolutionary relationships across Amazonia.

492         Our genome-wide estimates of  $N_e$  and gene flow were more similar to estimates from  
493 regions with signatures of selection versus regions deemed to be evolving neutrally. For instance,  
494 areas of the genome estimated to be evolving neutrally had up to 13% larger  $N_e$  in *P.*  
495 *nigromaculata* and 64% higher gene flow in *X. spixii* than estimates based on genome-wide loci

496 (Figure 7). These results are in agreement with studies indicating that demographic parameter  
497 estimation can be severely affected by positive and background selection (Schrider et al. 2016;  
498 Johri et al. 2021; Johri et al.). Natural selection can skew levels of genetic variation in a similar  
499 way to certain non-equilibrium demographic histories, often leading to overestimates of  
500 population bottlenecks and the rate of demographic expansions (Ewing and Jensen 2016;  
501 Schrider et al. 2016). For example, positive selection leading to fixation of large haplotypes  
502 linked to the target of selection may mimic population bottlenecks (Wayne and Simonsen 1998),  
503 and the recovery from these sweeps, might inflate the proportion of rare variants, resembling  
504 recent population expansions (Schrider et al. 2016). Although we did not model demographic  
505 changes, summary statistics that are indicative of demographic oscillations such as Tajima's D,  
506 varied considerably across the genome, with more negative values in regions of low  
507 recombination (Figure 2). Predictions for the historical demography of populations are explicitly  
508 linked to commonly tested Amazonian diversification hypotheses [e.g., the refugia hypothesis  
509 (Haffer 1969)], and understanding how drift and selection have shaped different regions of the  
510 genome will be key to building more nuanced biogeographic models. Our examination of three  
511 codistributed species showed that the effect of selection on demographic analyses was a general  
512 phenomenon that can have a profound effect on modeling biogeographic dynamics.

513         Our data show pervasive signatures of selection across the genome of three co-occurring  
514 species. We estimated that on average 31.6% (accounting for false positives) of the genome of  
515 focal species had a high probability ( $>0.70$ ) for models with selective sweeps or linked selection.  
516 Recent estimations for birds and mammals show substantial variation in the proportion of the  
517 genome subject to selection, with estimates ranging above 50% (McVicker et al. 2009; Pouyet et  
518 al. 2018; Brand et al. 2021; Manthey et al. 2021). Although our data indicate that regions

519 potentially affected by linked selection had a better fit to a bifurcating phylogenetic model, these  
520 regions were not suitable for population-level analyses (Schrider et al. 2016; Pouyet et al. 2018).  
521 Hence, reconciling phylogenetic inference and demographic parameter estimations in  
522 phylogenomic approaches might demand recombination and selection-aware approaches  
523 (Charlesworth and Jensen 2021). By characterizing the genomic landscape, the effect of selection  
524 in demographic parameter estimations can be mitigated by targeting genomic regions as distant  
525 as possible from potential targets of selection such as genes and functional elements, as well as  
526 avoiding areas of low recombination or affected by biased gene conversion (Pouyet et al. 2018).  
527 A key problem with selecting loci with distinct characteristics is that current methods designed to  
528 estimate recombination and selection across the genome achieve optimal performance when the  
529 demographic history of a population is known (Dapper and Payseur 2018; Harris et al. 2018;  
530 Rousselle et al. 2018; Johri et al. 2020). On the other hand, demographic parameters may be  
531 heavily biased when recombination and selection are neglected (Ewing and Jensen 2016; Pouyet  
532 et al. 2018). This conundrum indicates that methods designed to simultaneously account for  
533 multiple genomic processes, such as recombination, selection, drift, and mutation (Johri et al.  
534 2020; Barroso and Dutheil 2021; Johri et al. 2021), associated with simulation studies (Tigano et  
535 al. 2021) might be necessary to unbiasedly estimate evolutionary parameters from genome-wide  
536 variation.

537

### 538 *Heterogeneous genomic landscapes within and between species*

539 The genomic landscapes of our focal species were highly heterogeneous and presented  
540 some key differences between species. Chromosome size was a good predictor of genetic  
541 diversity, recombination rate, and phylogenetic signal in two of the species (*P. nigromaculata*

542 and *X. spixii*). The lack of association between chromosome size and genomic characteristics in  
543 *L. vociferans* was unexpected given that, during meiosis, chromosome segregation often requires  
544 at least one recombination event per homologous chromosome pair (Fledel-Alon et al. 2009),  
545 leading to higher recombination rates in shorter chromosomes (Kaback et al. 1992; Farré et al.  
546 2012; Kawakami et al. 2014; Haenel et al. 2018; Manthey et al. 2021). This lack of association  
547 has also been observed in other species of birds and mammals (Pessia et al. 2012; Dutoit, Burri,  
548 et al. 2017; Kartje et al. 2020) and could be explained by a reduced synteny between our  
549 references and the zebra finch genome, or the historical demography of the species, which in  
550 some cases can reverse the expected associations between recombination, genetic diversity, and  
551 chromosome size (Van Belleghem et al. 2018; Tigano et al. 2021). However, the former scenario  
552 was less likely due to the relative stability of chromosomes across avian species (Ellegren 2010).

553         The concordant patterns of genetic diversity and differentiation across the genomes of  
554 isolated populations within species indicated that genomic architecture was likely conserved over  
555 the population history of our focal taxa, as observed in other systems (Dutoit, Vijay, et al. 2017;  
556 Van Doren et al. 2017; Vijay et al. 2017; Delmore et al. 2018; Tigano et al. 2021). For example,  
557 consistent variation in *Fst* values across the genome of population pairs of the same species was  
558 likely reflecting the genomic landscape of the ancestral population. Regions of low  
559 recombination and *Ne* in the parent population would promote faster differentiation between  
560 daughter populations after isolation. These results agree with the idea that in birds,  
561 recombination hotspots are associated with gene promoters, which might help maintain a  
562 conserved landscape of recombination across lineages that span for millions of years (Singhal et  
563 al. 2015).

564         Identifying the driving forces shaping patterns of diversity along the genome of non-

565 model organisms is a major endeavor in modern genomics and is critical to understand how  
566 theoretical models and patterns observed in model organisms extend to natural systems  
567 (Comeron 2014; Elyashiv et al. 2016; Stankowski et al. 2019; Barroso and Dutheil 2021). In this  
568 study, we demonstrate that the interplay between recombination and selection had a strong  
569 impact on phylogenetic inference and demographic parameter estimates. However, other  
570 genomic processes might be contributing to this pattern. For instance, levels of polymorphism  
571 across the genome could be derived from variation in mutation rate (Jónsson et al. 2018; Smith et  
572 al. 2018; Besenbacher et al. 2019; Barroso and Dutheil 2021). Non-crossover gene conversion  
573 (Korunes and Noor 2017), where DNA strands break during meiosis and are repaired based on  
574 homologous sequences without crossing-over, and crossover events could be mutagenic, leading  
575 to higher mutation rates in areas of higher recombination (Arbeithuber et al. 2015; Korunes and  
576 Noor 2017). Simulation studies have rejected gene conversion as a process driving genome-wide  
577 patterns of genomic diversity in relatively recent divergence events (Tigano et al. 2021) and  
578 empirical studies suggest that mutations associated with crossover events occur at relatively low  
579 frequencies (Halldorsson et al. 2019). Although differential mutation rate across the genome  
580 might not explain the strong association between genetic diversity and genomic architecture, the  
581 majority of the variation in genetic diversity in our focal species was not explained by  
582 recombination. This suggests that variation in mutation rate, not associated with recombination,  
583 could be playing a role in the genomic landscape of genetic diversity. It is important to note that  
584 irrespective of the processes driving the heterogeneous levels of genetic variation across the  
585 genome, these biases on genome-wide phylogenetic and population genetics inferences may  
586 remain unless the multitude of parameters varying across the genome are modeled in a unifying  
587 approach (Johri et al. 2021). Until then, genomic-architecture-aware approaches might be

588 essential to disentangle the effects of intrinsic genomic characteristics and selection from neutral  
589 processes.

590

## 591 **Conclusions**

592 We present comparative empirical evidence of systematic biases in estimating genome-wide  
593 evolutionary parameters in one of the most well-studied biogeographic models on earth. The  
594 interplay between recombination, selection, and gene flow produced a highly heterogeneous  
595 landscape of genetic diversity and differentiation within and between species, where typically  
596 used methods might fail to recapitulate the effects of landscape evolution on the genome.  
597 Phylogenetic approaches and demographic parameter estimation are essential to test alternative  
598 hypotheses of diversification (Knowles 2009) and have been extensively used in  
599 phylogeographic studies across Amazonia (Aleixo 2004; Fernandes et al. 2012; Ribas et al.  
600 2012; Capurucho et al. 2013; Fernandes et al. 2013; Thom and Aleixo 2015). Allopatric  
601 differentiation and secondary contact are potentially the most common modes of speciation in  
602 Amazonia producing widespread differentiation across the genome due to the effects of genetic  
603 drift and within-population selection. These processes lead to a background pattern of  
604 differentiation that was likely to be associated with genomic architecture (Manthey et al. 2021),  
605 however, patterns of association might not be concordant between species. Comparative studies  
606 in biogeography often report idiosyncratic patterns across multiple levels of populations  
607 histories, with heterogeneous patterns of differentiation and contrasting divergence times  
608 associated with the same geographic barrier (Smith et al. 2014; Naka and Brumfield 2018; Silva  
609 et al. 2019; Provost et al. 2021), and idiosyncratic population size changes over time (Bai et al.  
610 2018; Thom et al. 2020; Carvalho et al. 2021). Our results suggest that genomic architecture

611 should be considered as another level of complexity that is also subject to idiosyncrasies between  
612 species.

613

## 614 **Material and methods**

### 615 *Studied species, sampling design and whole-genome sequencing*

616 We selected three species with populations occurring in southeastern Amazonia occurring  
617 in distinct forest strata of upland forest habitats: 1) *Phlegopsis nigromaculata*, an obligatory  
618 army-ant follower restricted to the understory, with three distinct subspecies isolated by Xingu  
619 and Tocantins rivers with considerable levels of genetic differentiation (A. Aleixo et al. 2009); 2)  
620 *Xiphorhynchus spixii*, which occupies the midstory of eastern Amazonian forests, and has two  
621 structured populations divided by the Xingu River (Aleixo 2004); 3) *Lipaugus vociferans*, a  
622 widespread canopy species, without genetic structure reported across rivers.

623 To optimize the spatial representation of our samples, we selected a single individual per  
624 locality targeting approximately 10 individuals per interfluve per species (Tapajos, Xingu, and  
625 Belem), yielding a total of 31, 31, and 26 samples for *P. nigromaculata*, *L. vociferans*, and *X.*  
626 *spixii*, respectively (Table S1; Figure 1). We isolated genomic DNA from muscle tissue  
627 preserved in alcohol (65 samples) and skin from the toe pads of museum specimens (31  
628 samples). All samples were loaned from the Museu Paraense Emilio Goeldi (MPEG). From  
629 tissues, we extracted DNA with Qiagen high molecular weight DNA kit (MagAttract HMW  
630 DNA Kit - Qiagen). For the toe pads, we performed a protocol specific for degraded DNA  
631 consisting of additional steps for washing the samples with H<sub>2</sub>O and EtOH prior to extracting  
632 and extra time for digestion. We modified the DNeasy extraction protocol (DNeasy Blood &  
633 Tissue Kits - Qiagen) by replacing the standard spin columns with the QIAquick PCR filter

634 columns (QIAquick PCR Purification Kit - Qiagen), selecting for smaller fragments of DNA,  
635 typically found in degraded samples. Toe pad extractions were conducted on a dedicated lab for  
636 working with historical samples at the American Museum of Natural History (AMNH) to reduce  
637 contamination risk. We quantified DNA extracts using a Qubit 2.0 Fluorometer (Thermo Fisher  
638 Scientific). Illumina libraries with variable insert sizes were generated and samples were  
639 sequenced by Rapid genomics (Gainesville, Florida) to ~10x coverage using 3.5 lanes of paired-  
640 end (2x150 bp) Illumina S4 NovaSeq 6000. Raw reads were initially trimmed and filtered using  
641 trimmomatic v0.36 (Bolger et al. 2014).

642

#### 643 *Genomic reference, gene annotation and outgroups*

644 We obtained reference genomes from closely related species. For *P. nigromaculata*, we used as  
645 reference the genome of *Rhegmatorhina melanosticta* (Coelho et al. 2019) with TMRCA =  
646 9.60Ma (Harvey et al. 2020). For *X. spixii*, we used the genome of *X. elegans*  
647 (GCA\_013401175.1 ASM1340117v1; NCBI genome ID: 92877; Feng et al. 2020) with TMRCA  
648 = 2.36Ma (Harvey et al. 2020), and for *L. vociferans* we used the genome of *Cephalopterus*  
649 *ornatus* (GCA\_013396775.1 ASM1339677v1; NCBI genome ID: 92752; Feng et al.  
650 2020) with TMRCA =15.10Ma (Harvey et al. 2020). Given that bird chromosomes are known to  
651 have high synteny and evolutionary stasis between distantly related species (Ellegren 2010), we  
652 produced a pseudo-chromosome reference genome for *X. elegans* and *C. ornatus* by ordering and  
653 orienting their scaffolds to the 35 chromosomes of the Zebra Finch (*Taeniopygia guttata*; version  
654 taeGut3.2.4) with chromosome in satsuma v3.1.0 (Grabherr et al. 2010). For *R. melanosticta*,  
655 we used the chromosome assignment conducted in a previous study (Coelho et al. 2019). To  
656 check the completeness of our pseudo-chromosome references, we used Busco v2.0.1



657 (Waterhouse et al. 2018) to search for a set of single-copy avian ortholog loci. To transfer  
658 genome annotations from the scaffold assemblies to the pseudo chromosome reference genomes,  
659 we mapped the genomic coordinates of each annotated feature using gmap (Wu and Watanabe  
660 2005). For *R. melanosticta* we used the annotation performed by Mikkelsen and Weir (2020) and  
661 for *X. elegans* and *L. vociferans*, we used the annotations performed by Feng et al. (2020). A  
662 total of 98.90% (15,195), 97.46% (14,834 genes), and 98.92% (15,599 genes) of all annotated  
663 genes in *R. melanosticta*, *X. elegans*, and *C. ornatus* were successfully mapped to the pseudo-  
664 chromosome reference, respectively.

665 We downloaded raw reads from additional closely related species that were used as  
666 outgroups in phylogenetic analyses. For *P. nigromaculata*, we included *R. melanosticta*,  
667 *Sakesphorus luctuosus* (GCA\_013396695.1 ASM1339669v1; NCBI genome ID: 92896; Feng et  
668 al. 2020) and *X. elegans* as outgroups. For *X. spixii*, we included *X. elegans*, *S. luctuosus*,  
669 *Campylorhamphus procurvoides* (GCA\_013396655.1 ASM1339665v1; NCBI genome ID:  
670 92894; Feng et al. 2020), and *Furnarius figulus* (GCA\_013397465.1 ASM1339746v1; NCBI  
671 genome ID: 92763; Feng et al. 2020). For *L. vociferans*, we included *C. ornatus*, *Pachyramphus*  
672 *minor* (GCA\_013397135.1 ASM1339713v1; NCBI genome ID: 92755; Feng et al. 2020), and  
673 *Tyrannus savana* (GCA\_013399735.1 ASM1339973v1; NCBI genome ID: 92814; Feng et al.  
674 2020).

675

#### 676 *Read alignment, variant calling and filtering*

677 Trimmed and filtered reads were aligned to the references in BWA v0.7.17 (Li and  
678 Durbin 2009) using default parameters. We used Picard v.2.0.1 (Broad Institute, Cambridge,  
679 MA; <http://broadinstitute.github.io/picard/>) to 1) sort sam files with SortSam; 2) reassign reads to

680 groups with AddOrReplaceReadGroups; 3) identify duplicated reads with Markduplicates; 4)  
681 calculate summary statistics with CollectAlignmentSummaryMetrics, CollectInsertSizeMetrics,  
682 and CollectRawWgsMetrics; and 5) create indexes with BuildBamIndex. All Picard functions  
683 were run with default parameters. We used the standard GATK v3.8 (McKenna et al. 2010)  
684 pipeline to 1) call SNPs and Indels for each individual separately with HaplotypeCaller; 2)  
685 perform genotyping with GenotypeGVCFs, assuming a value of 0.05 for the --heterozygosity  
686 flag; 3) flag and filter variants with VariantFiltration. Given the lack of a high confidence SNP  
687 panel, we implemented hard filtering options recommended by the Broad Institute's Best  
688 Practices (<https://gatk.broadinstitute.org/>). We filtered SNPs with quality by depth below 2 (QD  
689 < 2.0), SNPs where reads containing the alternative allele were considerably shorter than reads  
690 with the reference allele (ReadPosRankSum < -8), SNPs with root mean square of the mapping  
691 quality lower than 40 (MQ < 40.0), SNPs with evidence of strand bias (FS > 60.0 and SOR >  
692 3.0), and SNPs where the read with the alternative allele had a lower mapping quality than the  
693 reference allele (MQRankSumTest < - 12.5). Lastly, we filtered raw VCF files by keeping only  
694 bi-allelic sites, with no more than 50% of missing information, with a minimum read depth of 4  
695 and maximum of 30, and read quality score > Q20 using VCFTOOLS v0.1.15 (Danecek et al.  
696 2011). We phased the genotypes in our genomic vcf files using BEAGLE v5.1 (Browning and  
697 Browning 2007; Browning et al.) in sliding windows of 10kb and overlap between windows of  
698 1kb.

699

#### 700 *Recombination, window-based summary statistics, and genetic structure*

701 To estimate recombination rate ( $r$  = recombination rate per base pair per generation) from  
702 population level data for each of the species complexes we used ReLERNN (Adrion et al. 2020).

703 This approach estimates the genomic landscape of recombination by leveraging recurrent neural  
704 networks using the raw genotype matrix as a feature vector, avoiding the need to convert the data  
705 into summary statistics. ReLERNN calculates  $r$  by simulating data matching the  $\theta W$  of the  
706 observed DNA sequences. Simulations are then used to train and test a recurrent neural network  
707 model designed to predict the per base recombination rate across sliding windows of the genome.  
708 Given that genetic structure could potentially influence ReLERNN estimates (Mezmouk et al.  
709 2011; Mangin et al. 2012), we restricted our analyses to the individuals of the Tapajos interfluve,  
710 that was composed exclusively of recent tissue samples, and we did not find any sign of  
711 population substructure in the three lineages (see below). Although we did not estimate  $r$  for all  
712 populations, the landscape of recombination across bird lineages is considered conserved, and  
713 variation between recently diverged populations should be minimal (Singhal et al. 2015). To  
714 account for the historical demography of the populations, we provided to ReLERNN the output  
715 of our SMC++ analyses (see below) with the `--demographicHistory` option. We considered a  
716 mutation rate of  $2.42 \times 10^{-9}$  mutations per generation and one year generation time (Jarvis et al.  
717 2014; Zhang et al. 2014).

718 We calculated population genomics summary statistics for sliding windows using scripts  
719 available at [https://github.com/simonhmartin/genomics\\_general](https://github.com/simonhmartin/genomics_general). We initially converted vcf files  
720 per species into geno format, using `parseVCF.py`.  $F_{st}$ ,  $D_{xy}$ , and  $\pi$  were calculated for the  
721 different populations in each of three interfluves using `popgenWindows.py`. We estimated the  $D$   
722 statistics in sliding windows using the `ABBABABAwindows.py`. We used species tree topology  
723 with the highest probability from our species tree analyses (see *Phylogenomic analyses, and*  
724 *topology weighting*) treating the Tapajos, Xingu and Belem populations as the terminals. For all  
725 summary statistics, we used phased vcf files, setting the window size to 10kb (`-w` option) without

726 overlap between windows and the minimum number of sites without missing information per  
727 window to 500 (-m option). To obtain GC content estimates across 100kb windows for our  
728 reference genomes, we used sequir v4.2 (Charif and Lobry 2007) in R. We fit general linear  
729 regressions and Pearson's correlation index between population genetics summary statistics,  
730 phylogenetic weights, and genomic architecture estimates in R. To account for the potential non-  
731 linearity of these relationships, we also fit a LOESS model using the R package caret (Kuhn  
732 2008). Models were trained using leave-one-out cross-validation of 80% of the total data.

733         To explore the genome-wide pattern of genetic structure, we performed Principal  
734 Component Analysis (PCA) and individuals relatedness analyses based on identity-by-descent  
735 using SNPRelate v1.20.1 (Zheng et al. 2012) in R. In order to minimize the effect of missing  
736 genotypes in the PCA, we filtered our vcf files to keep SNPs present in at least 70% of the  
737 individuals. We also used SNPRelate to perform an identity-by-state (IBS) analysis among  
738 individuals for each species. To avoid the influence of SNP clusters in our PCA and IBS  
739 analysis, we pruned SNPs in approximate linkage equilibrium ( $LD > 0.2$ ) with each other.

740         Specific regions of the genome might be differently affected by selection and gene flow,  
741 exhibiting different levels of genetic diversity and differentiation between populations (Ellegren  
742 et al. 2012; Langley et al. 2012; Li et al. 2019). To explore the genomic variation in genetic  
743 structure we used lostruct (Li and Ralph 2019). This approach 1) summarizes the relatedness  
744 between individuals across genomic windows using PCA, 2) calculates the pairwise dissimilarity  
745 in relatedness among window, 3) uses multidimensional scaling (MDS) to produce a  
746 visualization of how variable patterns of relatedness are across the genome, and 4) allows the  
747 user to combine regions by similarity to inspect contrasting patterns of genetic structure across  
748 the genome. We ran lostruct for windows with 1000 SNPs, allowing for 30% of missing

749 genotypes. To visualize the results, we selected the 10% of the windows closer to the three  
750 further points on the two first MDS coordinates and performed individual PCA analysis on  
751 clustered windows.

752

### 753 *Historical demography, selective sweeps, and linked selection*

754 We estimated variations on effective population sizes through time using unphased  
755 genomes in SMC++ v1.15.3 (Terhorst et al. 2017). Our goal with this approach was to estimate  
756 past fluctuations in  $N_e$  to be included in ReLERNN (Adrion et al. 2020) and DiploS/HIC (Kern  
757 and Schrider 2018) models to account for historical demography. We ran SMC++ exclusively for  
758 the Tapajos population of each species assuming a mutation rate of  $2.42 \times 10^{-9}$  mutations per  
759 generation and one year generation time (Jarvis et al. 2014; Zhang et al. 2014). We explored  
760 historical demography of populations within a time window between the present and 300,000ya.

761 To detect signatures of selection across the genome we used a Supervised Machine  
762 Learning (SML) approach implemented in diploS/HIC (Kern and Schrider 2018). This approach  
763 used coalescent simulations of genomic windows to train and test a Convolutional Neural  
764 Network (CNN) designed to predict hard and soft selective sweeps and genetic variation linked  
765 to selective sweeps across sliding windows of the genome. Genomic windows were simulated  
766 using discoal (Kern and Schrider 2016) according to five distinct models: 1) hard selective  
767 sweep; 2) soft selective sweep; 3) neutral variation linked to soft selective sweep; 4) neutral  
768 variation linked to hard selective sweep; and 5) neutral genetic variation. We performed 5,000  
769 simulations per model using 220kb genomic windows divided into 11 subwindows. To account  
770 for the neutral demography of the populations, which is essential to obtain robust model  
771 classification between windows (Harris et al. 2018), we added demographic parameters

772 estimated with SMC++ into discoal simulations. To account for uncertainty in simulated  
773 parameters, we followed the approach of Manthey et al. (2021) by allowing current  $N_e$  to vary  
774 between  $\frac{1}{3}$  to  $3x$  the estimated value obtained with SMC++ within a uniform distribution.  
775 Population scaled recombination rate ( $\rho=4Nr$ ; where  $r$  is the recombination rate estimated  
776 with ReLERNN) priors were set based on the minimum and maximum values obtained across  
777 windows with ReLERNN. We set a uniform prior for selection coefficients ranging from  
778 0.00025 to 0.025, and we conditioned sweep completion between the present and 10,000  
779 generations ago. We used a uniform prior between 0.01 and 0.2 for the initial frequency of  
780 adaptive variants in soft sweep models. Simulations were converted into feature vectors  
781 consisting of population genetics summary statistics, taking into account the observed amount of  
782 missing data by using a genomic mask. We estimated the probability of alternative models for  
783 observed windows of 20kb. We ran CNNs for 1000 epochs, stopping the run if validation  
784 accuracy did not improve for 50 consecutive epochs. We ran five independent runs and predicted  
785 observed data with the run that provided the highest accuracy on testing data. To assess the  
786 classification power of the CNNs, we inspected the overall accuracy, the false positive rate  
787 (FPR), recall (the number of correct positive predictions made out of all positive predictions that  
788 could have been made), and area under the curve (AUC). To acknowledge the uncertainty in  
789 model selection, we only assigned a model with a probability higher than 0.7 to a genomic  
790 window.

791

### 792 *Phylogenomic analyses, and topology weighting*

793 To estimate phylogenetic relationship between individuals, we estimated supermatrix  
794 trees concatenating all SNPs using IQTree2 (Minh et al. 2020). We converted vcf files to phylip

795 format using vcf2phylip.py (Ortiz 2019), randomly resolving heterozygous genotypes, and  
796 keeping SNPs present in at least 80% of the individuals. In IQTree2 we ran a total of 1000  
797 bootstrap replicates and controlled for ascertainment bias assuming a GTR+ASC substitution  
798 model. To estimate phylogenetic trees based on sliding windows of phased vcf files, we used  
799 PHYML v3.0 (Guindon et al. 2010) following (Martin and Van Belleghem 2017). We tested  
800 windows with different amounts of information content, selecting regions with 50, 100, 500 and  
801 1000 SNPs. We conducted 100 bootstrap replicates per window. To estimate unrooted topology  
802 weight for each window across the genome, we used Twisst (Martin and Van Belleghem 2017).  
803 This approach allowed us to quantify the relationships among taxa that are not necessarily  
804 monophyletic, providing an assessment of the most likely topology for a given genomic region.  
805 Given that windows with different information content yielded similar results for the topology  
806 weights across the genome, we only present the results for 100 SNPs windows (average window  
807 size of 14,503 bp, 15,637 bp, and 5,821 bp for *P. nigromaculata*, *X. spixii*, and *L. vociferans*,  
808 respectively) in subsequent analyses.

809       To estimate the posterior probability of unrooted species trees, we used Astral-III v5.1.1  
810 (Zhang et al. 2018; Rabiee et al. 2019), using the gene trees produced with phymml as inputs. We  
811 used Astral to score unrooted trees (-q option), estimating their quartet score, branch lengths, and  
812 branch support. We set as our main topology (outgroup,Belem(Xingu,Tapajos), and used the -t 2  
813 option to calculate the same metrics for the first alternative and second alternative topologies.  
814 Given we only have four terminals per lineage (3 populations + outgroup), there are only three  
815 possible unrooted trees. Therefore, this approach allowed us to calculate the posterior probability  
816 of all possible topologies. We conducted this approach for the whole set of gene trees and also  
817 for subsets of the data, based on specific characteristics of each window. To assess how support

818 for a specific topology varies based on thresholds for specific summary statistics, we selected  
819 windows across the genome with the upper and lower 10% tile for recombination rate,  $F_{st}$ ,  $\pi$ ,  
820  $D_{xy}$  and  $D$  statistics.

821

822 *Model based approach to account for recombination and selection.*

823 In order to explicitly account for gene flow while testing for alternative topologies and  
824 estimating demographic parameters of genomic windows, we used a combination of coalescent  
825 simulations and supervised machine learning. We simulated data under three alternative  
826 topologies, matching the unrooted trees tested in our phylogenetic approach: topology 1) (out,  
827 (Belem,(Xingu, Tapajos))); topology 2) (out,(Tapajos,(Xingu, Belem))); topology 3) (out,(Xingu,  
828 (Tapajos, Belem))). We allowed for constant gene flow after the divergence between Xingu and  
829 Belem, and Xingu and Tapajos populations. We did not allow gene flow between Belem and  
830 Tapajos due to the geographic disjunction between these populations. We simulated 5,000 loci of  
831 10kb, using uniform and wide priors for all parameters (Table S19), and performed 1 million  
832 simulations per model. We assumed a fixed mutation rate of  $2.42 \times 10^{-9}$  mutations per generation  
833 and one year generation time (Jarvis et al. 2014; Zhang et al. 2014). Genetic data for each model  
834 was simulated in PipeMaster (Gehara et al. 2017) which allows for a user-friendly  
835 implementation of msABC (Pavlidis et al. 2010). We summarized genetic variation of observed  
836 and simulated data in a feature vector composed of population genetics summary statistics,  
837 including mean and variance across loci: number of segregating sites per population and summed  
838 across populations, nucleotide diversity per population and for all populations combined,  
839 Watterson's theta (Watterson 1975) per population and for all populations combined, pairwise  
840  $F_{st}$  between populations, number of shared alleles between pairs of populations, number of



841 private alleles per population and between pairs of populations, and number of fixed alleles per  
842 population and between pairs of populations. To align loci across individuals, phased vcf files  
843 per population were split every 10kb windows and converted into a fasta format including  
844 monomorphic sites using bcftools (Li 2011). Fasta alignments were converted into feature  
845 vectors with PipeMaster which uses PopGenome (Pfeifer et al. 2014) in R. To obtain a genome-  
846 wide estimate of demographic parameters, we selected one 10kb genomic window every 100kb  
847 to reduce the effect of linkage between windows, and we subsampled 5,000 windows from this  
848 data set. We explored how simulated models fitted the observed data PCAs by plotting the first  
849 four PCs of simulated statistics vs observed. We also generated goodness-of-fit plots using the  
850 gfit function of abc v2.1 (Csilléry et al. 2012) in R.

851 To classify observed datasets into our three models, we used a Neural Network (nnet)  
852 implemented in Keras v2.3 (<https://github.com/rstudio/keras>) in R. After an initial exploration  
853 for the best architecture for our nnet, we conducted our final analyses using three hidden layers  
854 with 32 internal nodes and a “relu” activation function. The output layer was composed of three  
855 nodes and a “softmax” activation function. 25% of the simulations were used as testing data. We  
856 ran the training step for 1000 epochs using “adam” optimizer and a batch size of 20,000. 5% of  
857 the training data set was used for validation, and we used `accrury` and a  
858 `sparse_categorical_crossentropy` for the loss function to track improvements in model  
859 classification. For the most probable model considering genome-wide windows per species, we  
860 estimated demographic parameters with a nnet with a similar architecture but designed to predict  
861 continuous variables. For this step, we used an output layer with a single node and a “relu”  
862 activation. In the training step, we used the mean absolute percentage error (MAE) as an  
863 optimizer, training the nnet for 3000 epochs with batch size of 10,000 and a validation split of

864 0.1. We ran this procedure 10 times for each demographic parameter and summarized the results  
865 by calculating the mean across estimates. To additionally assess the accuracy of parameter  
866 estimation we calculated the coefficient of correlation between estimated and true simulated  
867 values of the testing data set. To explore how genome-wide parameter estimation differs from  
868 regions with distinct signature of selection and under neutrality, we created subsets of 10kb  
869 windows that were assigned with high probability ( $> 0.70$ ) to one of the five distinct models  
870 implemented in diploS/HIC. For each species, we estimated parameters based on the best model  
871 (topology) considering genome-wide windows. We selected up to 1000 windows for each of the  
872 five selection classes and performed the same approach as described above.

873 To obtain window-based model probability and demographic parameter estimates, we  
874 used a similar approach as described above but simulating 100kb window size and using a  
875 modified version of PipeMaster (Gehara et al. 2017) that allowed us to simulate intra locus  
876 recombination. By selecting a larger window size we increased the information content and  
877 resolution of summary statistics of single genomic windows. We performed 100,000 simulations  
878 per model, and used the same uniform priors for all parameters as implemented above. For  
879 intralocus recombination, we set a uniform prior ranging from 0 to the higher estimated value  
880 with ReLERNN per species (*P. nigromaculata* =  $3.021 \times 10^{-9}$ ; *X. spixii* =  $2.475 \times 10^{-9}$ ; *L.*  
881 *vociferans* =  $2.171 \times 10^{-9}$ ).

882 Lastly, to explore how recombination rate and gene flow impact topology weight, we  
883 performed coalescent simulations based on demographic parameters estimated for *P.*  
884 *nigromaculata*, and calculated topology weights using Twisst (Martin and Van Belleghem  
885 2017). We simulated 1,000 windows of 10kb for four models varying the presence of intra-locus  
886 recombination and gene flow between Xingu and Belem, assuming topology 1 (three ingroups

887 plus one outgroup). Simulated parameters are available on Table S20. Simulations were  
888 performed with PipeMaster, and we converted the ms output to phylip format with PopGenome.  
889 We ran trees for each 10 kb window with IQTREE-2 using default parameters and ran Twisst on  
890 this estimated set of trees (Figure S15).

891

## 892 **Acknowledgments**

893 We would like to thank K. Provost, J. Merwin, V. Chua, E. Tenorio, J. Cracraft, P. Sweet, T.  
894 Trombone, B. Bird, L. Musher. We also thank the Museu Paraense Emílio Goeldi—MPEG for  
895 tissue samples. All genetic samples were included on the SisGen platform under the protocols  
896 AA7DDBF and AB8BB93. G.T. was funded by the Frank M. Chapman memorial fund of the  
897 American Museum of Natural History. Romina Batista received support from Coordenação de  
898 Aperfeiçoamento de Pessoal de Nível Superior – Brasil (CAPES-INPA proc.  
899 88887477562/2020-00). B.T.S. was supported by awards from the National Science Foundation  
900 US (DEB-1655736; DBI-2029955).

901

## 902 **Data availability**

903 The raw genetic data underlying this article are available in NCBI short read archive at  
904 Bioproject # (accession numbers will be provided upon acceptance). All code and source datasets  
905 needed to replicate this study are available at <https://doi.org/number> will be provided upon  
906 acceptance (zenodo):<https://github.com/GregoryThom/Genomic-architecture-Amazonian-birds>.

907

## 908 **References**

909 Adrion JR, Galloway JG, Kern AD. 2020. Predicting the Landscape of Recombination Using  
910 Deep Learning. *Mol. Biol. Evol.* 37:1790–1808.

- 911 Albert JS, Craig JM, Tagliacollo VA, Petry P. 2018. Upland and lowland fishes: a test of the  
912 river capture hypothesis. *Mountains, climate and biodiversity*:273–294.
- 913 Aleixo A. 2004. Historical diversification of a terra-firme forest bird superspecies: a  
914 phylogeographic perspective on the role of different hypotheses of Amazonian  
915 diversification. *Evolution* 58:1303–1317.
- 916 Aleixo A, Burlamaqui TCT, Schneider MPC. 2009. Molecular Systematics and Plumage  
917 Evolution in the Monotypic Obligate Army-Ant-Following Genus *Skutchia*  
918 (*Thamnophilidae*). *Condor* 111:382–387.
- 919 Arbeithuber B, Betancourt AJ, Ebner T, Tiemann-Boege I. 2015. Crossovers are associated with  
920 mutation and biased gene conversion at recombination hotspots. *Proc. Natl. Acad. Sci. U. S.*  
921 *A.* 112:2109–2114.
- 922 Barrera-Guzmán AO, Aleixo A, Shawkey MD, Weir JT. 2018. Hybrid speciation leads to novel  
923 male secondary sexual ornamentation of an Amazonian bird. *Proceedings of the National*  
924 *Academy of Sciences* 115:E218–E225.
- 925 Barroso GV, Dutheil JY. 2021. Unpublished data,  
926 <https://www.biorxiv.org/content/10.1101/2021.09.16.460667.abstract>, last accessed  
927 November 25, 2021.
- 928 Bates JM, Hackett SJ, Cracraft J. 1998. Area-relationships in the Neotropical lowlands: an  
929 hypothesis based on raw distributions of Passerine birds. *Journal of Biogeography* 25:783–  
930 793.
- 931 Berv JS, Campagna L, Feo TJ, Castro-Astor I, Ribas CC, Prum RO, Lovette IJ. 2021. Genomic  
932 phylogeography of the White-crowned Manakin *Pseudopipra pipra* (Aves: Pipridae)  
933 illuminates a continental-scale radiation out of the Andes. *Mol. Phylogenet. Evol.*:107205.
- 934 Besenbacher S, Hvilsom C, Marques-Bonet T, Mailund T, Schierup MH. 2019. Direct estimation  
935 of mutations in great apes reconciles phylogenetic dating. *Nat Ecol Evol* 3:286–292.
- 936 Bolger AM, Lohse M, Usadel B. 2014. Trimmomatic: a flexible trimmer for Illumina sequence  
937 data. *Bioinformatics* 30:2114–2120.
- 938 Brand CM, White FJ, Ting N, Webster TH. 2021. Unpublished data,  
939 <https://www.biorxiv.org/content/10.1101/2020.12.14.422788v3.abstract>, last accessed  
940 November 25, 2021.
- 941 Brandvain Y, Kenney AM, Flagel L, Coop G, Sweigart AL. 2014. Speciation and introgression  
942 between *Mimulus nasutus* and *Mimulus guttatus*. *PLoS Genet.* 10:e1004410.
- 943 Browning BL, Zhou Y, Browning SR. A one penny imputed genome from next generation  
944 reference panels. *Am. J. Hum. Genet.* 103(3):338–348
- 945 Browning SR, Browning BL. 2007. Rapid and accurate haplotype phasing and missing-data

- 946 inference for whole-genome association studies by use of localized haplotype clustering.  
947 *Am. J. Hum. Genet.* 81:1084–1097.
- 948 Burri R, Nater A, Kawakami T, Mugal CF, Olason PI, Smeds L, Suh A, Dutoit L, Bureš S,  
949 Garamszegi LZ, et al. 2015. Linked selection and recombination rate variation drive the  
950 evolution of the genomic landscape of differentiation across the speciation continuum of  
951 *Ficedula* flycatchers. *Genome Res.* 25:1656–1665.
- 952 Byrne H, Lynch Alfaro JW, Sampaio I, Farias I, Schneider H, Hrbek T, Boubli JP. 2018. Titi  
953 monkey biogeography: Parallel Pleistocene spread by *Plecturocebus* and *Cheracebus* into a  
954 post-Pebas Western Amazon. *Zool. Scr.* 47:499–517.
- 955 Charif D, Lobry JR. 2007. SeqinR 1.0-2: A Contributed Package to the R Project for Statistical  
956 Computing Devoted to Biological Sequences Retrieval and Analysis. In: Bastolla U, Porto  
957 M, Roman HE, Vendruscolo M, editors. *Structural Approaches to Sequence Evolution: Molecules, Networks, Populations*. Berlin, Heidelberg: Springer Berlin Heidelberg. p. 207–  
958 232.  
959
- 960 Charlesworth B. 1998. Measures of divergence between populations and the effect of forces that  
961 reduce variability. *Molecular Biology and Evolution* 15:538–543
- 962 Charlesworth B, Jensen JD. 2021. Effects of Selection at Linked Sites on Patterns of Genetic  
963 Variability. *Annu. Rev. Ecol. Evol. Syst.* 52:177–197.
- 964 Charlesworth B, Morgan MT, Charlesworth D. 1993. The effect of deleterious mutations on  
965 neutral molecular variation. *Genetics* 134:1289–1303.
- 966 Chase MA, Ellegren H, Mugal CF. 2021. Positive selection plays a major role in shaping  
967 signatures of differentiation across the genomic landscape of two independent *Ficedula*  
968 flycatcher species pairs. *Evolution* 75:2179–2196.
- 969 Coelho LA, Musher LJ, Cracraft J. 2019. A Multireference-Based Whole Genome Assembly for  
970 the Obligate Ant-Following Antbird, *Rhegmatorhina melanosticta* (Thamnophilidae).  
971 *Diversity* 11:144.
- 972 Comeron JM. 2014. Background selection as baseline for nucleotide variation across the  
973 *Drosophila* genome. *PLoS Genet.* 10:e1004434.
- 974 Cracraft J. 1985. Historical Biogeography and Patterns of Differentiation within the South  
975 American Avifauna: Areas of Endemism. *Ornithol. Monogr.*:49–84.
- 976 Cruickshank TE, Hahn MW. 2014. Reanalysis suggests that genomic islands of speciation are  
977 due to reduced diversity, not reduced gene flow. *Mol. Ecol.* 23:3133–3157.
- 978 Csilléry K, François O, Blum MGB. 2012. abc: an R package for approximate Bayesian  
979 computation (ABC). *Methods Ecol. Evol.* 3:475–479.
- 980 Cutter AD, Payseur BA. 2013. Genomic signatures of selection at linked sites: unifying the

- 981           disparity among species. *Nat. Rev. Genet.* 14:262–274.
- 982   Dagosta FCP, De Pinna M. 2019. The Fishes of the Amazon: Distribution and Biogeographical  
983   Patterns, with a Comprehensive List of Species. *amnb* 2019:1–163.
- 984   Danecek P, Auton A, Abecasis G, Albers CA, Banks E, DePristo MA, Handsaker RE, Lunter G,  
985   Marth GT, Sherry ST, et al. 2011. The variant call format and VCFtools. *Bioinformatics*  
986   27:2156–2158.
- 987   Dapper AL, Payseur BA. 2018. Effects of Demographic History on the Detection of  
988   Recombination Hotspots from Linkage Disequilibrium. *Mol. Biol. Evol.* 35:335–353.
- 989   Delmore KE, Lugo Ramos JS, Van Doren BM, Lundberg M, Bensch S, Irwin DE, Liedvogel M.  
990   2018. Comparative analysis examining patterns of genomic differentiation across multiple  
991   episodes of population divergence in birds. *Evol Lett* 2:76–87.
- 992   Del-Rio G, Rego MA, Whitney BM, Schunck F, Silveira LF, Faircloth BC, Brumfield RT. 2021.  
993   Displaced clines in an avian hybrid zone (Thamnophilidae: Rhegmatorhina) within an  
994   Amazonian interfluve. *Evolution* <https://doi.org/10.1111/evo.14377>
- 995   Dutoit L, Burri R, Nater A, Mugal CF, Ellegren H. 2017. Genomic distribution and estimation of  
996   nucleotide diversity in natural populations: perspectives from the collared flycatcher  
997   (*Ficedula albicollis*) genome. *Mol. Ecol. Resour.* 17:586–597.
- 998   Dutoit L, Vijay N, Mugal CF, Bossu CM, Burri R, Wolf J, Ellegren H. 2017. Covariation in  
999   levels of nucleotide diversity in homologous regions of the avian genome long after  
1000   completion of lineage sorting. *Proceedings of the Royal Society B: Biological Sciences*  
1001   284:<http://dx.doi.org/10.1098/rspb.2016.2756>
- 1002   Edelman NB, Frandsen PB, Miyagi M, Clavijo B, Davey J, Dikow RB, García-Accinelli G, Van  
1003   Bellegghem SM, Patterson N, Neafsey DE, et al. 2019. Genomic architecture and  
1004   introgression shape a butterfly radiation. *Science* 366:594–599.
- 1005   Edwards SV, Robin V, Ferrand N, Moritz C. 2021. The evolution of comparative  
1006   phylogeography: putting the geography (and more) into comparative population genomics.  
1007   *Genome Biol. Evol.*: <http://dx.doi.org/10.1093/gbe/evab176>
- 1008   Ellegren H. 2010. Evolutionary stasis: the stable chromosomes of birds. *Trends Ecol. Evol.*  
1009   25:283–291.
- 1010   Ellegren H, Smeds L, Burri R, Olason PI, Backström N, Kawakami T, Künstner A, Mäkinen H,  
1011   Nadachowska-Brzyska K, Qvarnström A, et al. 2012. The genomic landscape of species  
1012   divergence in *Ficedula* flycatchers. *Nature* 491:756–760.
- 1013   Elyashiv E, Sattath S, Hu TT, Strutsovsky A, McVicker G, Andolfatto P, Coop G, Sella G. 2016.  
1014   A Genomic Map of the Effects of Linked Selection in *Drosophila*. *PLoS Genet.*  
1015   12:e1006130.

- 1016 Ewing GB, Jensen JD. 2016. The consequences of not accounting for background selection in  
1017 demographic inference. *Mol. Ecol.* 25:135–141.
- 1018 Farré M, Micheletti D, Ruiz-Herrera A. 2012. Recombination Rates and Genomic Shuffling in  
1019 Human and Chimpanzee - A New Twist in the Chromosomal Speciation Theory. *Mol. Biol.*  
1020 *Evol.* 30:853–864.
- 1021 Feng S, Stiller J, Deng Y, Armstrong J, Fang Q, Reeve AH, Xie D, Chen G, Guo C, Faircloth  
1022 BC, et al. 2020. Dense sampling of bird diversity increases power of comparative genomics.  
1023 *Nature* 587:252–257.
- 1024 Ferreira M, Fernandes AM, Aleixo A, Antonelli A, Olsson U, Bates JM, Cracraft J, Ribas CC.  
1025 2018. Evidence for mtDNA capture in the jacamar *Galbula leucogastra*/chalconothorax  
1026 species-complex and insights on the evolution of white-sand ecosystems in the Amazon  
1027 basin. *Mol. Phylogenet. Evol.* 129:149–157.
- 1028 Fledel-Alon A, Wilson DJ, Broman K, Wen X, Ober C, Coop G, Przeworski M. 2009. Broad-  
1029 scale recombination patterns underlying proper disjunction in humans. *PLoS Genet.*  
1030 5:e1000658.
- 1031 Fontaine MC, Pease JB, Steele A, Waterhouse RM, Neafsey DE, Sharakhov IV, Jiang X, Hall  
1032 AB, Catteruccia F, Kakani E, et al. 2015. Mosquito genomics. Extensive introgression in a  
1033 malaria vector species complex revealed by phylogenomics. *Science* 347:1258524.
- 1034 Garrigan D, Kingan SB, Geneva AJ, Andolfatto P, Clark AG, Thornton KR, Presgraves DC.  
1035 2012. Genome sequencing reveals complex speciation in the *Drosophila simulans* clade.  
1036 *Genome Res.* 22:1499–1511.
- 1037 Gehara M, Garda AA, Werneck FP, Oliveira EF, da Fonseca EM, Camurugi F, Magalhães F de  
1038 M, Lanna FM, Sites JW Jr, Marques R, et al. 2017. Estimating synchronous demographic  
1039 changes across populations using hABC and its application for a herpetological community  
1040 from northeastern Brazil. *Mol. Ecol.* 26:4756–4771.
- 1041 Gillespie JH. 2000. Genetic drift in an infinite population. The pseudohitchhiking model.  
1042 *Genetics* 155:909–919.
- 1043 Grabherr MG, Russell P, Meyer M, Mauceli E, Alföldi J, Di Palma F, Lindblad-Toh K. 2010.  
1044 Genome-wide synteny through highly sensitive sequence alignment: Satsuma.  
1045 *Bioinformatics* 26:1145–1151.
- 1046 Guindon S, Dufayard J-F, Lefort V, Anisimova M, Hordijk W, Gascuel O. 2010. New  
1047 algorithms and methods to estimate maximum-likelihood phylogenies: assessing the  
1048 performance of PhyML 3.0. *Syst. Biol.* 59:307–321.
- 1049 Haenel Q, Laurentino TG, Roesti M, Berner D. 2018. Meta-analysis of chromosome-scale  
1050 crossover rate variation in eukaryotes and its significance to evolutionary genomics.  
1051 *Molecular Ecology* 27:2477–2497.

- 1052 Haffer J. 1969. Speciation in amazonian forest birds. *Science* 165:131–137.
- 1053 Haffer J. 2008. Hypotheses to explain the origin of species in Amazonia. *Braz. J. Biol.* 68:917–  
1054 947.
- 1055 Halldorsson BV, Palsson G, Stefansson OA, Jonsson H, Hardarson MT, Eggertsson HP,  
1056 Gunnarsson B, Oddsson A, Halldorsson GH, Zink F, et al. 2019. Characterizing mutagenic  
1057 effects of recombination through a sequence-level genetic map. *Science*  
1058 363:<http://dx.doi.org/10.1126/science.aau1043>
- 1059 Harris RB, Sackman A, Jensen JD. 2018. On the unfounded enthusiasm for soft selective sweeps  
1060 II: Examining recent evidence from humans, flies, and viruses. *PLoS Genet.* 14:e1007859.
- 1061 Harvey MG, Bravo GA, Claramunt S, Cuervo AM, Derryberry GE, Battilana J, Seeholzer GF,  
1062 McKay JS, O’Meara BC, Faircloth BC, et al. 2020. The evolution of a tropical biodiversity  
1063 hotspot. *Science* 370:1343–1348.
- 1064 Hudson RR. 1983. Properties of a neutral allele model with intragenic recombination. *Theor.*  
1065 *Popul. Biol.* 23:183–201.
- 1066 Hudson RR, Kaplan NL. 1995. Deleterious background selection with recombination. *Genetics*  
1067 141:1605–1617.
- 1068 Jarvis ED, Mirarab S, Aberer AJ, Li B, Houde P, Li C, Ho SYW, Faircloth BC, Nabholz B,  
1069 Howard JT, et al. 2014. Whole-genome analyses resolve early branches in the tree of life of  
1070 modern birds. *Science* 346:1320–1331.
- 1071 Jensen JD, Payseur BA, Stephan W, Aquadro CF, Lynch M, Charlesworth D, Charlesworth B.  
1072 2019. The importance of the Neutral Theory in 1968 and 50 years on: A response to Kern  
1073 and Hahn 2018. *Evolution* 73:111–114.
- 1074 Johri P, Aquadro CF, Beaumont M, Charlesworth B, Excoffier L, Eyre-Walker A, Keightley PD,  
1075 Lynch M, McVean G, Payseur BA, Pfeifer SP, Stephan W, Jensen JD. 2021. Unpublished  
1076 data, <http://dx.doi.org/10.1101/2021.10.27.466171>, last accessed November 25, 2021.
- 1077 Johri P, Charlesworth B, Jensen JD. 2020. Toward an Evolutionarily Appropriate Null Model:  
1078 Jointly Inferring Demography and Purifying Selection. *Genetics* 215:173–192.
- 1079 Johri P, Riall K, Becher H, Excoffier L, Charlesworth B, Jensen JD. 2021. The Impact of  
1080 Purifying and Background Selection on the Inference of Population History: Problems and  
1081 Prospects. *Mol. Biol. Evol.* 38:2986–3003.
- 1082 Jónsson H, Sulem P, Arnadottir GA, Pálsson G, Eggertsson HP, Kristmundsdottir S, Zink F,  
1083 Kehr B, Hjorleifsson KE, Jensson BÖ, et al. 2018. Multiple transmissions of de novo  
1084 mutations in families. *Nat. Genet.* 50:1674–1680.
- 1085 Kaback D, Guacci V, Barber D, Mahon J. 1992. Chromosome size-dependent control of meiotic  
1086 recombination. *Science* 256:228–232.



- 1087 Kartje ME, Jing P, Payseur BA. 2020. Weak Correlation between Nucleotide Variation and  
1088 Recombination Rate across the House Mouse Genome. *Genome Biol. Evol.* 12:293–299.
- 1089 Kawakami T, Smeds L, Backström N, Husby A, Qvarnström A, Mugal CF, Olason P, Ellegren  
1090 H. 2014. A high density linkage map enables a second generation collared flycatcher  
1091 genome assembly and reveals the patterns of avian recombination rate variation and  
1092 chromosomal evolution. *Molecular Ecology* 23:4035–4058.
- 1093 Kern AD, Hahn MW. 2018. The Neutral Theory in Light of Natural Selection. *Mol. Biol. Evol.*  
1094 35:1366–1371.
- 1095 Kern AD, Schrider DR. 2016. Discoal: flexible coalescent simulations with selection.  
1096 *Bioinformatics* 32:3839–3841.
- 1097 Kern AD, Schrider DR. 2018. diploS/HIC: An Updated Approach to Classifying Selective  
1098 Sweeps. *G3* 8:1959–1970.
- 1099 Knowles LL. 2009. Statistical Phylogeography. *Annu. Rev. Ecol. Evol. Syst.* 40:593–612.
- 1100 Korunes KL, Noor MAF. 2017. Gene conversion and linkage: effects on genome evolution and  
1101 speciation. *Mol. Ecol.* 26:351–364.
- 1102 Kuhn M. 2008. Building predictive models in R using the caret package. *J. Stat. Softw.* 28, 1–26.
- 1103 Langley CH, Stevens K, Cardeno C, Lee YCG, Schrider DR, Pool JE, Langley SA, Suarez C,  
1104 Corbett-Detig RB, Kolaczkowski B, et al. 2012. Genomic variation in natural populations of  
1105 *Drosophila melanogaster*. *Genetics* 192:533–598.
- 1106 Leaché AD, Harris RB, Rannala B, Yang Z. 2014. The influence of gene flow on species tree  
1107 estimation: a simulation study. *Syst. Biol.* 63:17–30.
- 1108 Li G, Figueiró HV, Eizirik E, Murphy WJ. 2019. Recombination-Aware Phylogenomics Reveals  
1109 the Structured Genomic Landscape of Hybridizing Cat Species. *Mol. Biol. Evol.* 36:2111–  
1110 2126.
- 1111 Li H. 2011. A statistical framework for SNP calling, mutation discovery, association mapping  
1112 and population genetical parameter estimation from sequencing data. *Bioinformatics*  
1113 27:2987–2993.
- 1114 Li H, Durbin R. 2009. Fast and accurate short read alignment with Burrows–Wheeler transform.  
1115 *Bioinformatics* 25:1754–1760.
- 1116 Li H, Ralph P. 2019. Local PCA Shows How the Effect of Population Structure Differs Along  
1117 the Genome. *Genetics* 211:289–304.
- 1118 Luna LW, Ribas CC, Aleixo A. 2021. Genomic differentiation with gene flow in a widespread  
1119 Amazonian floodplain specialist bird species. *J.*  
1120 *Biogeogr.*:<https://doi.org/10.1111/jbi.14257>

- 1121 Lynch Alfaro JW, Boubli JP, Paim FP, Ribas CC, Silva MNF da, Messias MR, Röhe F, Mercês  
1122 MP, Silva Júnior JS, Silva CR, et al. 2015. Biogeography of squirrel monkeys (genus  
1123 Saimiri): South-central Amazon origin and rapid pan-Amazonian diversification of a  
1124 lowland primate. *Mol. Phylogenet. Evol.* 82 Pt B:436–454.
- 1125 Mangin B, Siberchicot A, Nicolas S, Doligez A, This P, Cierco-Ayrolles C. 2012. Novel  
1126 measures of linkage disequilibrium that correct the bias due to population structure and  
1127 relatedness. *Heredity* 108:285–291.
- 1128 Manthey JD, Klicka J, Spellman GM. 2021. The genomic signature of allopatric speciation in a  
1129 songbird is shaped by genome architecture (Aves: *Certhia americana*). *Genome Biol.*  
1130 *Evol.*:<http://dx.doi.org/10.1093/gbe/evab120>
- 1131 Martin SH, Davey JW, Salazar C, Jiggins CD. 2019. Recombination rate variation shapes  
1132 barriers to introgression across butterfly genomes. *PLoS Biol.* 17:e2006288.
- 1133 Martin SH, Van Belleghem SM. 2017. Exploring Evolutionary Relationships Across the Genome  
1134 Using Topology Weighting. *Genetics* 206:429–438.
- 1135 Mather K. 1938. CROSSING-OVER. *Biological Reviews* 13:252–292
- 1136 McKenna A, Hanna M, Banks E, Sivachenko A, Cibulskis K, Kernytsky A, Garimella K,  
1137 Altshuler D, Gabriel S, Daly M, et al. 2010. The Genome Analysis Toolkit: a MapReduce  
1138 framework for analyzing next-generation DNA sequencing data. *Genome Res.* 20:1297–  
1139 1303.
- 1140 McVicker G, Gordon D, Davis C, Green P. 2009. Widespread genomic signatures of natural  
1141 selection in hominid evolution. *PLoS Genet.* 5:e1000471.
- 1142 Meunier J, Duret L. 2004. Recombination drives the evolution of GC-content in the human  
1143 genome. *Mol. Biol. Evol.* 21:984–990.
- 1144 Mezouk S, Dubreuil P, Bosio M, Décousset L, Charcosset A, Praud S, Mangin B. 2011. Effect  
1145 of population structure corrections on the results of association mapping tests in complex  
1146 maize diversity panels. *Theor. Appl. Genet.* 122:1149–1160.
- 1147 Mikkelsen EK, Weir JT. 2020. The genome of the Xingu scale-backed antbird (*Willisornis vidua*  
1148 *nigrigula*) reveals lineage-specific adaptations. *Genomics* 112:4552–4560.
- 1149 Minh BQ, Schmidt HA, Chernomor O, Schrempf D, Woodhams MD, von Haeseler A, Lanfear  
1150 R. 2020. IQ-TREE 2: New Models and Efficient Methods for Phylogenetic Inference in the  
1151 Genomic Era. *Mol. Biol. Evol.* 37:1530–1534.
- 1152 Mořkovský L, Janoušek V, Reif J, Řídl J, Pačes J, Choleva L, Janko K, Nachman MW, Reifová  
1153 R. 2018. Genomic islands of differentiation in two songbird species reveal candidate genes  
1154 for hybrid female sterility. *Mol. Ecol.* 27:949–958.
- 1155 Musher LJ, Giakoumis M, Albert J, Del Rio G, Rego M, Thom G, Aleixo A, Ribas CC,

- 1156 Brumfield RT, Smith BT, Cracraft J. 2021. Unpublished data,  
1157 <https://www.biorxiv.org/content/10.1101/2021.11.15.468717v1>, last accessed November  
1158 25, 2021.
- 1159 Nachman MW, Payseur BA. 2012. Recombination rate variation and speciation: theoretical  
1160 predictions and empirical results from rabbits and mice. *Philos. Trans. R. Soc. Lond. B Biol.*  
1161 *Sci.* 367:409–421.
- 1162 Nguyen L-T, Schmidt HA, von Haeseler A, Minh BQ. 2015. IQ-TREE: A Fast and Effective  
1163 Stochastic Algorithm for Estimating Maximum-Likelihood Phylogenies. *Molecular Biology*  
1164 *and Evolution* 32:268–274.
- 1165 de Oliveira DP, de Carvalho VT, Hrbek T. 2016. Cryptic diversity in the lizard genus *Plica*  
1166 (Squamata): phylogenetic diversity and Amazonian biogeography. *Zool. Scr.* 45:630–641.
- 1167 Ortiz EM. 2019. vcf2phylip v2.0: convert a VCF matrix into several matrix formats for  
1168 phylogenetic analysis. Available from: <https://zenodo.org/record/2540861>
- 1169 Pavlidis P, Laurent S, Stephan W. 2010. msABC: a modification of Hudson’s ms to facilitate  
1170 multi-locus ABC analysis. *Mol. Ecol. Resour.* 10:723–727.
- 1171 Penz C, DeVries P, Tufto J, Lande R. 2015. Butterfly dispersal across Amazonia and its  
1172 implication for biogeography. *Ecography* 38:410–418.
- 1173 Pessia E, Popa A, Mousset S, Rezvoy C, Duret L, Marais GAB. 2012. Evidence for widespread  
1174 GC-biased gene conversion in eukaryotes. *Genome Biol. Evol.* 4:675–682.
- 1175 Pfeifer B, Wittelsbürger U, Ramos-Onsins SE, Lercher MJ. 2014. PopGenome: an efficient  
1176 Swiss army knife for population genomic analyses in R. *Mol. Biol. Evol.* 31:1929–1936.
- 1177 Pouyet F, Aeschbacher S, Thiéry A, Excoffier L. 2018. Background selection and biased gene  
1178 conversion affect more than 95% of the human genome and bias demographic inferences.  
1179 *Elife* 7: <http://dx.doi.org/10.7554/eLife.36317>
- 1180 Rabiee M, Sayyari E, Mirarab S. 2019. Multi-allele species reconstruction using ASTRAL. *Mol.*  
1181 *Phylogenet. Evol.* 130:286–296.
- 1182 Ribas CC, Aleixo A, Nogueira ACR, Miyaki CY, Cracraft J. 2012. A palaeobiogeographic  
1183 model for biotic diversification within Amazonia over the past three million years. *Proc.*  
1184 *Biol. Sci.* 279:681–689.
- 1185 Rousselle M, Mollion M, Nabholz B, Bataillon T, Galtier N. 2018. Overestimation of the  
1186 adaptive substitution rate in fluctuating populations. *Biol. Lett.* 14:  
1187 <http://dx.doi.org/10.1098/rsbl.2018.0055>
- 1188 Roux C, Fraïsse C, Castric V, Vekemans X, Pogson GH, Bierne N. 2014. Can we continue to  
1189 neglect genomic variation in introgression rates when inferring the history of speciation? A  
1190 case study in a *Mytilus* hybrid zone. *J. Evol. Biol.* 27:1662–1675.

- 1191 Schridder DR, Shanku AG, Kern AD. 2016. Effects of linked selective sweeps on demographic  
1192 inference and model selection. *Genetics* 204:1207–1223.
- 1193 Schumer M, Xu C, Powell DL, Durvasula A, Skov L, Holland C, Blazier JC, Sankararaman S,  
1194 Andolfatto P, Rosenthal GG, et al. 2018. Natural selection interacts with recombination to  
1195 shape the evolution of hybrid genomes. *Science* 360:656–660.
- 1196 Seehausen O, Butlin RK, Keller I, Wagner CE, Boughman JW, Hohenlohe PA, Peichel CL,  
1197 Saetre G-P, Bank C, Brännström A, et al. 2014. Genomics and the origin of species. *Nat.*  
1198 *Rev. Genet.* 15:176–192.
- 1199 da Silva JMC, Rylands AB, da FONSECA GAB. 2005. The fate of the amazonian areas of  
1200 endemism. *Conserv. Biol.* 19:689–694.
- 1201 Silva SM, Peterson AT, Carneiro L, Burlamaqui TCT, Ribas CC, Sousa-Neves T, Miranda LS,  
1202 Fernandes AM, d’Horta FM, Araújo-Silva LE, et al. 2019. A dynamic continental moisture  
1203 gradient drove Amazonian bird diversification. *Sci Adv* 5:eaat5752.
- 1204 Singhal S, Leffler EM, Sannareddy K, Turner I, Venn O, Hooper DM, Strand AI, Li Q, Raney B,  
1205 Balakrishnan CN, et al. 2015. Stable recombination hotspots in birds. *Science* 350:928–932.
- 1206 Smith BT, McCormack JE, Cuervo AM, Hickerson MJ, Aleixo A, Cadena CD, Pérez-Emán J,  
1207 Burney CW, Xie X, Harvey MG, et al. 2014. The drivers of tropical speciation. *Nature*  
1208 515:406–409.
- 1209 Smith JM, Haigh J. 1974. The hitch-hiking effect of a favourable gene. *Genet. Res.* 23:23–35.
- 1210 Smith TCA, Arndt PF, Eyre-Walker A. 2018. Large scale variation in the rate of germ-line de  
1211 novo mutation, base composition, divergence and diversity in humans. *PLoS Genet.*  
1212 14:e1007254.
- 1213 Solís-Lemus C, Ané C. 2016. Inferring Phylogenetic Networks with Maximum Pseudolikelihood  
1214 under Incomplete Lineage Sorting. *PLoS Genet.* 12:e1005896.
- 1215 Stankowski S, Chase MA, Fuiten AM, Rodrigues MF, Ralph PL, Streisfeld MA. 2019.  
1216 Widespread selection and gene flow shape the genomic landscape during a radiation of  
1217 monkeyflowers. *Plos Biology*: <http://dx.doi.org/10.1101/342352>
- 1218 Terhorst J, Kamm JA, Song YS. 2017. Robust and scalable inference of population history from  
1219 hundreds of unphased whole genomes. *Nat. Genet.* 49:303–309.
- 1220 Tigano A, Khan R, Omer AD, Weisz D, Dudchenko O, Multani AS, Pathak S, Behringer RR,  
1221 Aiden EL, Fisher H, MacManes MD. 2021. Unpublished data,  
1222 <https://www.biorxiv.org/content/10.1101/2021.01.15.426870v1>, last accessed November  
1223 25, 2021.
- 1224 Thom G, Aleixo A. 2015. Cryptic speciation in the white-shouldered antshrike (*Thamnophilus*  
1225 *aethiops*, Aves – *Thamnophilidae*): The tale of a transcontinental radiation across rivers in

- 1226 lowland Amazonia and the northeastern Atlantic Forest. *Molecular Phylogenetics and*  
1227 *Evolution* 82:95–110.
- 1228 Thom G, Xue AT, Sawakuchi AO, Ribas CC, Hickerson MJ, Aleixo A, Miyaki C. 2020.  
1229 Quaternary climate changes as speciation drivers in the Amazon floodplains. *Sci Adv*  
1230 6:eaax4718.
- 1231 Van Belleghem SM, Baquero M, Papa R, Salazar C, McMillan WO, Counterman BA, Jiggins  
1232 CD, Martin SH. 2018. Patterns of Z chromosome divergence among *Heliconius* species  
1233 highlight the importance of historical demography. *Mol. Ecol.* 27:3852–3872.
- 1234 Van Doren BM, Campagna L, Helm B, Illera JC, Lovette IJ, Liedvogel M. 2017. Correlated  
1235 patterns of genetic diversity and differentiation across an avian family. *Mol. Ecol.* 26:3982–  
1236 3997.
- 1237 Vijay N, Weissensteiner M, Burri R, Kawakami T, Ellegren H, Wolf JBW. 2017. Genomewide  
1238 patterns of variation in genetic diversity are shared among populations, species and higher-  
1239 order taxa. *Mol. Ecol.* 26:4284–4295.
- 1240 Waterhouse RM, Seppey M, Simão FA, Manni M, Ioannidis P, Klioutchnikov G, Kriventseva  
1241 EV, Zdobnov EM. 2018. BUSCO Applications from Quality Assessments to Gene  
1242 Prediction and Phylogenomics. *Mol. Biol. Evol.* 35:543–548.
- 1243 Watterson GA. 1975. On the number of segregating sites in genetical models without  
1244 recombination. *Theor. Popul. Biol.* 7:256–276.
- 1245 Wayne ML, Simonsen KL. 1998. Statistical tests of neutrality in the age of weak selection.  
1246 *Trends Ecol. Evol.* 13:236–240.
- 1247 Weir JT, Faccio MS, Pulido-Santacruz P, Barrera-Guzmán AO, Aleixo A. 2015. Hybridization in  
1248 headwater regions, and the role of rivers as drivers of speciation in Amazonian birds.  
1249 *Evolution* 69:1823–1834.
- 1250 Wen D, Yu Y, Zhu J, Nakhleh L. 2018. Inferring Phylogenetic Networks Using PhyloNet. *Syst.*  
1251 *Biol.* 67:735–740.
- 1252 Wolf JBW, Ellegren H. 2017. Making sense of genomic islands of differentiation in light of  
1253 speciation. *Nat. Rev. Genet.* 18:87–100.
- 1254 Wu TD, Watanabe CK. 2005. GMAP: a genomic mapping and alignment program for mRNA  
1255 and EST sequences. *Bioinformatics* 21:1859–1875.
- 1256 Zeng K. 2013. A coalescent model of background selection with recombination, demography  
1257 and variation in selection coefficients. *Heredity* 110:363–371.
- 1258 Zhang C, Rabiee M, Sayyari E, Mirarab S. 2018. ASTRAL-III: polynomial time species tree  
1259 reconstruction from partially resolved gene trees. *BMC Bioinformatics* 19:153.

- 1260 Zhang G, Li C, Li Q, Li B, Larkin DM, Lee C, Storz JF, Antunes A, Greenwold MJ, Meredith  
1261 RW, et al. 2014. Comparative genomics reveals insights into avian genome evolution and  
1262 adaptation. *Science* 346:1311–1320.
- 1263 Zheng X, Levine D, Shen J, Gogarten SM, Laurie C, Weir BS. 2012. A high-performance  
1264 computing toolset for relatedness and principal component analysis of SNP data.  
1265 *Bioinformatics* 28:3326–3328.
- 1266
